# Supplementary material for: Effect of dexmedetomidine on postoperative nausea and vomiting in patients under general anaesthesia: an updated meta-analysis of randomised controlled trials
Source: PubMed Central journal article supplement — BMJ Open. 2023 Aug 1;13(8):e067102. doi: 10.1136/bmjopen-2022-067102 (PMC10394554; doi:10.1136/bmjopen-2022-067102), 2023-08-01
Supplement: bmjopen-2022-067102.draft_revisions.pdf [file bmjopen-2022-067102.draft_revisions.pdf]

# BMJ Open

BMJ Open is committed to open peer review. As part of this commitment we make the peer review history of every article we publish publicly available.

When an article is published we post the peer reviewers' comments and the authors' responses online. We also post the versions of the paper that were used during peer review. These are the versions that the peer review comments apply to.

The versions of the paper that follow are the versions that were submitted during the peer review process. They are not the versions of record or the final published versions. They should not be cited or distributed as the published version of this manuscript.

BMJ Open is an open access journal and the full, final, typeset and author-corrected version of record of the manuscript is available on our site with no access controls, subscription charges or pay-per-view fees (<http://bmjopen.bmj.com>).

If you have any questions on BMJ Open's open peer review process please email [info.bmjopen@bmj.com](mailto:info.bmjopen@bmj.com)

# BMJ Open

## The effect of dexmedetomidine on postoperative nausea and vomiting in patients under general anesthesia: an updated meta-analysis of randomized controlled trials

|                               |                                                                                                                                                                                                                                                                                                                                                                                                                                                                                                                                                                                                                                                            |
|-------------------------------|------------------------------------------------------------------------------------------------------------------------------------------------------------------------------------------------------------------------------------------------------------------------------------------------------------------------------------------------------------------------------------------------------------------------------------------------------------------------------------------------------------------------------------------------------------------------------------------------------------------------------------------------------------|
| Journal:                      | <i>BMJ Open</i>                                                                                                                                                                                                                                                                                                                                                                                                                                                                                                                                                                                                                                            |
| Manuscript ID                 | bmjopen-2022-067102                                                                                                                                                                                                                                                                                                                                                                                                                                                                                                                                                                                                                                        |
| Article Type:                 | Original research                                                                                                                                                                                                                                                                                                                                                                                                                                                                                                                                                                                                                                          |
| Date Submitted by the Author: | 02-Aug-2022                                                                                                                                                                                                                                                                                                                                                                                                                                                                                                                                                                                                                                                |
| Complete List of Authors:     | Zhao, Weihong; Hebei General Hospital, Department of Anesthesiology<br>Li, Jianli; Hebei General Hospital, Department of Anesthesiology<br>Wang, Na; Hebei General Hospital, Department of Rheumatology<br>Wang, Zhibin; The Fifth People's Hospital of Hengshui, Department of Anesthesiology<br>Zhang, Meng; Hebei General Hospital, Department of Anesthesiology<br>Zhang, Huanhuan; Hebei General Hospital, Department of Anesthesiology<br>Liu, Meinu; Hebei General Hospital, Department of Anesthesiology<br>He, Jinhua; Hebei General Hospital, Department of Anesthesiology<br>Yu, Dongdong; Hebei General Hospital, Department of Anesthesiology |
| Keywords:                     | ANAESTHETICS, Adult anaesthesia < ANAESTHETICS, Adult surgery < SURGERY, Adverse events < THERAPEUTICS                                                                                                                                                                                                                                                                                                                                                                                                                                                                                                                                                     |
|                               |                                                                                                                                                                                                                                                                                                                                                                                                                                                                                                                                                                                                                                                            |

SCHOLARONE™  
Manuscripts

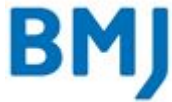

I, the Submitting Author has the right to grant and does grant on behalf of all authors of the Work (as defined in the below author licence), an exclusive licence and/or a non-exclusive licence for contributions from authors who are: i) UK Crown employees; ii) where BMJ has agreed a CC-BY licence shall apply, and/or iii) in accordance with the terms applicable for US Federal Government officers or employees acting as part of their official duties; on a worldwide, perpetual, irrevocable, royalty-free basis to BMJ Publishing Group Ltd ("BMJ") its licensees and where the relevant Journal is co-owned by BMJ to the co-owners of the Journal, to publish the Work in this journal and any other BMJ products and to exploit all rights, as set out in our [licence](#).

The Submitting Author accepts and understands that any supply made under these terms is made by BMJ to the Submitting Author unless you are acting as an employee on behalf of your employer or a postgraduate student of an affiliated institution which is paying any applicable article publishing charge ("APC") for Open Access articles. Where the Submitting Author wishes to make the Work available on an Open Access basis (and intends to pay the relevant APC), the terms of reuse of such Open Access shall be governed by a Creative Commons licence – details of these licences and which [Creative Commons](#) licence will apply to this Work are set out in our licence referred to above.

Other than as permitted in any relevant BMJ Author's Self Archiving Policies, I confirm this Work has not been accepted for publication elsewhere, is not being considered for publication elsewhere and does not duplicate material already published. I confirm all authors consent to publication of this Work and authorise the granting of this licence.

1           **The effect of dexmedetomidine on postoperative nausea and**  
2           **vomiting in patients under general anesthesia: an updated meta-**  
3           **analysis of randomized controlled trials**

4           Weihong ZHAO, MD<sup>1</sup>, Jianli LI, PhD<sup>1</sup>, Na WANG, MD<sup>2</sup>, Zhibin WANG, MD<sup>3</sup>,  
5           Meng ZHANG, MD<sup>1</sup>, Huanhuan ZHANG, MD<sup>1</sup>, Meinv LIU, MD<sup>1</sup>, Jinhua HE,  
6           MD<sup>1</sup>, Dongdong YU, MD<sup>1</sup>

7           <sup>1</sup> Department of Anesthesiology, Hebei General Hospital, Shijiazhuang 050000, Hebei  
8           Province, China

9           <sup>2</sup> Department of Rheumatology, Hebei General Hospital, Shijiazhuang 050000, Hebei  
10          Province, China

11          <sup>3</sup> Department of Anesthesiology, The Fifth People's Hospital of Hengshui, Hengshui,  
12          053000, Hebei Province, China.

13          **Corresponding author and correspondence to:**

14          Jianli Li, PhD.

15          Department of Anesthesiology, Hebei General Hospital,  
16          Shijiazhuang, China

17          E-mail: [hblijianli@163.com](mailto:hblijianli@163.com)

18          **Keywords:** Dexmedetomidine, Perioperative period, Postoperative nausea and  
19          vomiting, Side effects, Meta-analysis

20          **Word Counts**

21          Main text: 2865 words (Excluding title page, references, figures and tables)

## 1 ABSTRACT

2 **Objectives:** To explore the effect of dexmedetomidine on postoperative nausea and vomiting in  
3 adult patients after general anesthesia.

4 **Design:** Systematic review and meta-analysis.

5 **Data Sources:** We searched the PubMed, the Web of Science, the Cochrane Library and Embase  
6 (January 1, 2000, to June 30, 2022) to find the relevant randomized controlled trials (RCTs) using  
7 the following search terms: dexmedetomidine and postoperative nausea and vomiting. All studies  
8 included the primary outcome of interest: the incidence of postoperative nausea and vomiting.

9 **Data analysis:** All the relevant data were performed by using RevManV.5.4. Heterogeneity was  
10 tested for each outcome, and random effect or fixed effect models were selected according to the  
11 level of heterogeneity.

12 **Results:** In total of 18 trials involving 2018 patients were involved in this meta-analysis. The  
13 incidence of postoperative nausea and vomiting in dexmedetomidine group was obviously lower  
14 than that in control group (odds ratio [OR] =0.49, 95% CI 0.36 to 0.67) and the perioperative opioid  
15 consumption in dexmedetomidine group was also decreased significantly (standard mean difference  
16 [SMD] = -1.04, 95% CI -1.53 to -0.54). Moreover, the length of hospitalization (SMD= -2.29, 95%  
17 CI -4.31 to -0.28) and the extubation time (SMD= -0.75, 95% CI -1.26 to -0.25) in  
18 dexmedetomidine group were shorter. Whereas, higher number of patients receiving  
19 dexmedetomidine occurred bradycardia (OR=1.60, 95% CI 1.13 to 2.27).

20 **Conclusions:** Dexmedetomidine can decrease the occurrence of postoperative nausea and vomiting  
21 in adult patients under general anesthesia and promote the recovery after surgery. However,  
22 dexmedetomidine may increase the occurrence of bradycardia.

1 PROSPERO registration number: CRD 42022341548

2 **Strengths and limitations of this study**

- 3 ● This is an update meta-analysis of 18 published articles to investigate the effect of  
4 dexmedetomidine on postoperative nausea and vomiting in adult patients under general  
5 anesthesia.  
6 ● A thorough systematic review and meta-analysis provide confidence in the findings.  
7 ● The main limitation of this review is that varied quality and heterogeneity of included studies  
8 may limit the certainty of the findings of meta-analysis

9 **INTRODUCTION**

10 Postoperative nausea and vomiting (PONV), as a familiar negative events after operation, is  
11 known as nausea, vomiting, or retching within one day after operation(1), which may be due to the  
12 effect of anesthetics on the emetic control center in the medulla oblongata(2). The incidence of  
13 PONV is about 30% and even rising to 60%-80% in high-risk populations. PONV, an extreme poor  
14 medical experience for patients undergoing general anesthetic surgery, leads to many adverse  
15 influences including stomach discomfort, dehydration, water-electrolyte disorders, wound  
16 dehiscence, esophageal injury, reflux and aspiration, which extend the time of hospitalization and  
17 increase the medical costs(3). Fortunately, prophylactic antiemetic agents can decrease the  
18 happening of PONV, such as antihistamines, corticosteroids, dopamine antagonists, anticholinergics  
19 and 5-HT<sub>3</sub> receptor antagonists. However, these drugs have some side effects including headache,  
20 restlessness, dry mouth, hypotension and cardiovascular complications, which limit its use in some  
21 cases(4). Therefore, exploring suitable drugs and methods to prevent and treat PONV is necessary.

22 Dexmedetomidine (DEX), as a new adrenal  $\alpha_2$  receptor agonist with high selectivity, has

1  
2  
3  
4 1 sedation, hypnosis and analgesia effects without respiratory depression, which is widely used in  
5  
6 2 perioperative period. A previous study reported that DEX can decrease perioperative catecholamine  
7  
8  
9 3 release, maintain hemodynamic stability, reduce intraoperative analgesic and anesthetic  
10  
11 4 requirements, and improve the quality of recovery(5). These characteristics have enabled DEX to  
12  
13  
14 5 be a multifunctional drug in the presentments of numerous negative events during anesthesia. There  
15  
16  
17 6 were two meta-analyses found that DEX significantly alleviated the postoperative pain intensity and  
18  
19 7 decreased the opioid consumption(6; 7). For the last few years, the effect of DEX on PONV has  
20  
21  
22 8 attracted increasing attention from anesthesiologists. One clinical study has reported that  
23  
24  
25 9 postoperative administration of DEX, as patient-controlled analgesia (PCA) regimen, produced  
26  
27  
28 10 early antiemetic effects(8). Another research indicated that intravenous DEX could prevent the  
29  
30  
31 11 occurrence of PONV in adult patients after laparoscopic hysterectomy(9). While different results  
32  
33  
34 12 were observed in the similar articles(10; 11). Therefore, it is still disputed whether intraoperative  
35  
36  
37 13 use of DEX can ameliorate the occurrence of PONV in patients after general anesthesia.

38 14 As far as we know, no updated analysis of the data about the effect of DEX on PONV was  
39  
40  
41 15 performed during general anesthesia. Therefore, in order to obtain the most recent proof, we  
42  
43  
44 16 thoroughly evaluated the effect of intraoperative use of DEX on PONV in adult patients  
45  
46  
47 17 experiencing general anesthesia according to the results from the 18 randomized controlled trials  
48  
49  
50 18 (RCTs) in our meta-analysis. We hope these consequences will provide suggestions for  
51  
52  
53 19 anesthesiologists and surgeons to make better prevention plans in the future.

## 54 20 **METHODS**

### 55 56 21 **Patient and public involvement**

57  
58 22 No patient involved.  
59  
60

## 1 **Registration**

2 This meta-analysis was conducted by following the criteria as outlined in the PRISMA  
3 guidelines(12) (Supplementary document 1). The meta-analysis was registered on PROSPERO  
4 (registry number: CRD 42022341548).

## 5 **Search strategy**

6 Two investigators independently searched for articles published in PubMed, the Web of  
7 Science, Embase, and the Cochrane Library without any restrictions. The basic search words  
8 included: (“Dex” OR “dexmedetomidine”) AND (“PONV” OR “postoperative nausea and vomiting”  
9 OR “nausea” OR “vomiting” OR “nausea and vomiting” OR “postoperative emesis” OR  
10 “postoperative vomiting” OR “postoperative nausea”). The complete search strategy protocol was  
11 shown in Supplementary document 2. The literature search was updated on June 30, 2022.

## 12 **Inclusion and exclusion criteria**

13 The inclusion criteria: (1) RCTs; (2) Adult participants undergoing general anesthetic surgery;  
14 (3) The administration of DEX intraoperatively; (4) The outcomes in the included articles included  
15 nausea and vomiting; (5) DEX versus placebo or a single agent.

16 The exclusion criteria: (1) Reviews, abstracts, case reports or duplicates; (2) Drug/drugs  
17 (including DEX) versus combinational drugs; (3) Adult patients undergoing surgery under local or  
18 spinal-epidural anesthesia; (4) Full text not available.

## 19 **Data extraction and analysis**

20 All the information of the articles was collected independently by two researchers using  
21 standardized forms. Any problems were decided by a third author in order to discuss and reach an  
22 agreement. The corresponding data were collected: first author, type of surgery, publication year,



1 number of patients, administrations for patients, the incidence of PONV and bradycardia, the  
2 perioperative opioid consumption, the extubation time and the length of hospitalization. A  
3 standardized Excel file was used to save the extracted data.

#### 4 **Risk of bias assessment**

5 In accordance with the Cochrane risk-of-bias tool, the risk of bias in the included articles were  
6 evaluated by two authors independently (Figure 1). According to the following criteria: bias from  
7 selection, performance, detection, attrition, reporting and other, we reviewed and scored each study  
8 as "high", "unclear", and "low".

#### 9 **Statistical analysis**

10 We used the Review Manager 5.4 software to perform statistical analysis. For dichotomous  
11 data, we calculated odds ratios (ORs) with 95% confidence intervals (CIs). And we use standardized  
12 mean difference (SMD) and 95% CIs to analyze continuous outcomes. We used the *I*-square ( $I^2$ )  
13 test to evaluate the heterogeneity on included studies. A random effects model was chosen when  $I^2$   
14  $\geq 50\%$ , otherwise a fixed effect model was selected. Funnel plots were used for quality assessment  
15 of bias. And the sensitivity analysis was performed for this meta-analysis involving at least 10 trials.

## 16 **RESULTS**

### 17 **Study selection**

18 The procedure of article screening, selection of articles, and the causes for exclusion were  
19 displayed in the flow diagram (Figure 2). The initial search included 2659 documents, and after  
20 taking out the duplicates and checking the abstracts and titles, 33 trials were considered potentially  
21 eligible. After carefully reading the full-text studies, 18 studies were eventually included.

### 22 **Study characteristics**

1  
2  
3  
4 1 The main characteristics of the 18 articles were summed up in Table 1. 16 articles in the  
5  
6 2 included articles investigated the efficacy of DEX compared to saline, 1 trial examined the efficacy  
7  
8 3 of DEX compared to clonidine, and 1 trial compared to dexamethasone. The 18 articles in this meta-  
9  
10 4 analysis were published from 2015 to 2021 with sample sizes varying from 19 to 334 participants  
11  
12 5 and a total of 2018 patients.  
13  
14  
15  
16

17 6 **Table 1:** Characteristics of the included trials.  
18  
19  
20  
21  
22

| Author     | Year | Number  | Participants | Type of surgery                                    | Administration | Nausea and Vomiting |
|------------|------|---------|--------------|----------------------------------------------------|----------------|---------------------|
| Bakri      | 2015 | 43/43   | Adults       | Laparoscopic cholecystectomy                       | DEX/Dexa       | 9/12                |
| Peng       | 2015 | 38/38   | Adults       | Craniotomy                                         | DEX/Saline     | 16/28               |
| Chen       | 2016 | 30/30   | Adults       | Laparoscopic resection of colorectal cancer        | DEX/Saline     | 6/6                 |
| Bielka     | 2018 | 30/30   | Adults       | Laparoscopic cholecystectomy                       | DEX/Saline     | 2/8                 |
| Das        | 2018 | 50/50   | Adults       | Breast cancer surgery                              | DEX/Saline     | 2/8                 |
| Wu         | 2019 | 44/45   | Adults       | Laparoscopic radical prostatectomy                 | DEX/Saline     | 2/10                |
| Bala       | 2019 | 30/30   | Adults       | Transsphenoidal Pituitary Surgery                  | DEX/Saline     | 2/6                 |
| Wu         | 2019 | 20/20   | Adults       | Cholangiojejunostomy or radical resection of tumor | DEX/Saline     | 1/3                 |
| Bakshi     | 2020 | 19/21   | Adults       | Robotic-assisted laparoscopic oncosurgeries        | DEX/Saline     | 4/3                 |
| Chen       | 2020 | 39/38   | Adults       | Radical resection of gastric cancer                | DEX/Saline     | 1/3                 |
| Asri       | 2020 | 21/21   | Adults       | Thoracic Surgery                                   | DEX/Saline     | 0/5                 |
| Pi         | 2021 | 121/96  | Adults       | Thoracoscopic radical resection of lung cancer     | DEX/Saline     | 0/1                 |
| Lu         | 2021 | 334/331 | Adults       | Abdominal Surgery                                  | DEX/Saline     | 16/17               |
| Bafna      | 2021 | 35/35   | Adults       | Endoscopic sinus surgery                           | DEX/Clonidine  | 4/1                 |
| Prashantha | 2021 | 40/40   | Adults       | Laparoscopic cholecystectomy                       | DEX/Saline     | 5/14                |

|   |      |      |       |        |                                       |            |     |
|---|------|------|-------|--------|---------------------------------------|------------|-----|
| 1 |      |      |       |        |                                       |            |     |
| 2 |      |      |       |        |                                       |            |     |
| 3 | Chen | 2021 | 38/38 | Adults | Thoracoscopic pulmonary segmentectomy | DEX/Saline | 1/1 |
| 4 |      |      |       |        |                                       |            |     |
| 5 | Yan  | 2021 | 50/50 | Adults | Total Hip Arthroplasty                | DEX/Saline | 5/4 |
| 6 |      |      |       |        |                                       |            |     |
| 7 |      |      |       |        |                                       |            |     |
| 8 | Chen | 2021 | 40/40 | Adults | Intestinal Surgery                    | DEX/Saline | 1/6 |
| 9 |      |      |       |        |                                       |            |     |

11 1 Abbreviations: DEX, dexmedetomidine; Dexa, dexamethasone.

## 12 2 **The association between DEX and PONV**

13 3 All 18 trials involved the effect of DEX on the incidence of PONV. There was no heterogeneity  
 14 4 between the articles ( $P < 0.00001$ ,  $I^2 = 26\%$ , Fig. 3), so a fixed-effects model was chosen. The  
 15 5 consequences revealed that the occurrence of PONV in DEX group was lower than the control group  
 16 6 (OR=0.49, 95% CI 0.36 to 0.67, Fig. 3), which indicated that DEX notably prevent the happening  
 17 7 of PONV in adult patients after general anesthetic surgery.

## 18 8 **The association between DEX and perioperative opioid consumption**

19 9 8 studies assessed the effect of DEX on perioperative opioid consumption. Because of a high  
 20 10 heterogeneity ( $P < 0.00001$ ,  $I^2 = 91\%$ , Fig. 4), a random effect model was selected. The consequences  
 21 11 of this meta-analysis indicated that the perioperative opioid consumption was lower in DEX group  
 22 12 (SMD= -1.04, 95% CI -1.53 to -0.54, Fig. 4). Our results suggested that DEX decreased the  
 23 13 perioperative opioid consumption significantly.

## 24 14 **Other recovery outcomes**

25 15 4 literatures including 200 patients involved the length of hospitalization. The study  
 26 16 heterogeneity was high ( $P < 0.00001$ ,  $I^2 = 96\%$ , Fig. 5), so a random effect model was selected. The  
 27 17 consequence found that the length of hospitalization in DEX group was shorter (SMD= -2.29, 95%  
 28 18 CI -4.31 to -0.28, Fig. 5). 4 trials including 292 subjects referred to the extubation time. A random  
 29 19 effect model was chosen since the high heterogeneity ( $P = 0.004$ ,  $I^2 = 77\%$ , Fig. 6). There was a shorter

1 time to extubation in DEX group (SMD= -0.75, 95% CI -1.26 to -0.25, Fig. 6). Therefore, meta-  
2 analysis of the 8 literatures indicated that DEX could accelerate the recovery of patients after  
3 anesthesia.

#### 4 **Side effects**

5 8 trials described the incidence of bradycardia. A fixed effect model was selected considering  
6 the little heterogeneity ( $P=0.32$ ,  $I^2=14\%$ , Fig. 7). Compared to the control group, the number of  
7 participants developed bradycardia in the DEX group was higher (OR=1.60, 95% CI 1.13 to 2.27,  
8 Fig. 7). The consequences from this meta-analysis revealed that DEX may increase the occurrence  
9 of bradycardia.

#### 10 **Publication bias**

11 Publication bias of literatures that included in our meta-analysis was assessed by funnel plots.  
12 No publication bias was found (Fig. 8). We removed each study one by one for sensitivity analysis  
13 and found that the results did not change (Supplementary document 3).

#### 14 **DISCUSSION**

15 This present meta-analysis obviously showed that DEX is a potential effective agent for  
16 decreasing the incidence of PONV and promoting the recovery of adult patients undergoing general  
17 anesthetic surgery, but it might increase the incidence of bradycardia.

18 PONV is unsatisfactory experience and painful adverse event for patients, especially in the  
19 first day after surgery. Its incidence is approximately 30% and up to 80% without prevention(2; 13).  
20 Moreover, there may be some surgical types were associated with the high occurrence of PONV,  
21 especially in gynecological surgery, otolaryngology surgery and neurosurgery(4). There are many  
22 risk factors that can increase the incidence of PONV by 20% respectively in patients, including

1  
2  
3  
4 1 anesthetic factors, surgical factors, female sex, non-smokers, and the medical history of motion  
5  
6 2 sickness or/and PONV(14). These risk factors might also change with the premedication, anesthetic  
7  
8  
9 3 technique, postoperative management(15). Among the factors of anesthesia, general anesthesia is  
10  
11 4 more likely to cause PONV compared with regional anesthesia(16). The pathophysiology process  
12  
13  
14 5 of PONV is very elusive. A study suggested that injuries from operation, anesthesia, visceral nerve  
15  
16  
17 6 stimulation, hypoxia, hypotension, and pain are the major irritants, which could trigger the vomiting  
18  
19  
20 7 response when they reach the cortical/thalamic, cerebellar and vestibular nuclei, and the  
21  
22  
23 8 chemoreceptor triggering band outside of the blood-brain barrier(17). Although there are multiple  
24  
25  
26 9 methods and drugs to prevent PONV in clinical practice, the efficacy of PONV prophylaxis remains  
27  
28  
29 10 unsatisfactory especially in high-risk patients(2).

30 11 Our meta-analysis found that DEX could notably decrease the happening of PONV in adult  
31  
32  
33 12 patients undergoing general anesthesia. DEX exerts the anxiolytic, sedative and analgesic effects by  
34  
35  
36 13 reducing the release of norepinephrine induced by  $\alpha_2$  adrenergic receptors in the spinal cord and  
37  
38  
39 14 locus coeruleus. However, it could not result in excessive sedation or respiratory depression as the  
40  
41  
42 15 results of accumulation(18). Therefore, DEX was used as an appropriate short-acting sedative for  
43  
44  
45 16 patients under general anesthesia in perioperative period. Previous articles indicated that DEX  
46  
47  
48 17 reduced the occurrence of PONV, which were similar to our result. For instance, a study has reported  
49  
50  
51 18 that DEX administered could decrease the occurrence of PONV in patients experiencing intestinal  
52  
53  
54 19 surgery(19), another study discovered that intraoperative use of DEX could be a valid measure to  
55  
56  
57 20 prevent the PONV in patients after laparoscopic radical prostatectomy(20). But the mechanisms for  
58  
59  
60 21 the effect of DEX on PONV are still obscure. Previous articles reported DEX could decrease the  
22  
23  
24 22 occurrence of PONV by modulating 5-HT and dopamine release, suppressing the histamine-induced

1  
2  
3  
4 1 expression of IL-6, and reducing sympathetic outflow and total catecholamine release(21; 22). So,  
5  
6 2 one of the key mechanisms about the effect of DEX on PONV might be attributable to the regulation  
7  
8  
9 3 of neurotransmitters. It is well known to us that the amount of intraoperative opioid use directly  
10  
11 4 influenced the frequency and degree of PONV(16). In our meta-analysis, we revealed that DEX  
12  
13  
14 5 could decrease the perioperative opioid consumption, which might explain the antiemetic effect of  
15  
16  
17 6 DEX.

18  
19 7 DEX also can prevent perioperative stress response by regulating heart rate and blood pressure,  
20  
21  
22 8 which are the most common adverse events especially in patient with atrioventricular block or  
23  
24  
25 9 hypovolemia(23). In this meta-analysis, the incidence of perioperative bradycardia was increased in  
26  
27  
28 10 patients with DEX. Similar consequence was found in a meta-analysis of 3638 patients from 9 high-  
29  
30  
31 11 quality RCTs(24). Bradycardia may be due to presynaptic  $\alpha$ -2 receptor stimulation by DEX, which  
32  
33  
34 12 results in decreasing norepinephrine release.

35  
36 13 Nausea and vomiting are two distinguishing phenomena. A study has shown that DEX reduced  
37  
38 14 early postoperative nausea but not vomiting in adult patients undergoing general anesthesia(25).  
39  
40  
41 15 However, nausea and vomiting usually coexist with patients, and the occurrence of postoperative  
42  
43  
44 16 vomiting (POV) or postoperative nausea (PON) clearly consistent with PONV, so a number of  
45  
46  
47 17 studies do not attempt to distinguish between these two variables(26-28). Therefore, we just  
48  
49  
50 18 explored the influence of DEX on PONV in this meta-analysis.

51  
52 19 In fact, there have been two previous meta-analyses also reported that DEX could low the  
53  
54 20 occurrence of PONV compared to the placebo group(15; 29). However, PONV has been rapidly  
55  
56  
57 21 developed and there are the increasing numbers of studies about it in the last few years. Therefore,  
58  
59  
60 22 an up-date meta-analysis is necessary to assess whether the consequences of newly updated or

1  
2  
3  
4 1 published studies can alter the previous meta-analysis. Overall, DEX did decrease the occurrence of  
5  
6 2 PONV and accelerated the recovery of adult patients after general anesthesia in this meta-analysis.  
7  
8

### 9 3 **LIMITATIONS**

10 4 There were several limitations to this meta-analysis. Firstly, the included articles did not give  
11  
12 5 consistent doses of DEX, the influence of diverse doses of DEX on PONV in adult patients after  
13  
14 6 general anesthesia needs to be further explored. Secondly, the severity degree of PONV was not  
15  
16 7 quantified using a formal scale, so further study is required to explore the effect of DEX on different  
17  
18 8 severity degree of PONV.  
19  
20  
21  
22  
23

### 24 9 **CONCLUSION**

25  
26  
27 10 In a word, DEX can decrease the occurrence of PONV in adult patients who experiencing  
28  
29 11 general anesthesia, and accelerate postoperative recovery. Thus, DEX can be used as an adjuvant  
30  
31 12 drug for general anesthesia to prevent the development of PONV in clinical practice. However, it is  
32  
33 13 essential to be vigilant the occurrence of bradycardia during surgery. The results of this meta-  
34  
35 14 analysis may offer a new testimony to expand the clinical significance of DEX apart from its  
36  
37 15 conventional usage for sedation and analgesia.  
38  
39  
40  
41  
42

43 16 **Author Contributions** WZ and JL were involved in the conception and design of this meta-analysis. NW and ZW  
44  
45 17 conducted the data extraction. HZ and ML contributed to statistical analysis. WZ analyzed the data and drafted the  
46  
47 18 manuscript. JH, DY and MZ offered major comments and revised the manuscript. All authors have read and  
48  
49 19 approved the manuscript.  
50  
51  
52

53 20 **Funding** The work was supported by the Key Research and Development Program of Hebei Province (Grant No.  
54  
55 21 19277714D). The funding bodies had no role in the design of the study, and will have no role in the data collection,  
56  
57 22 analysis, interpretation of data, and writing of the manuscript.  
58  
59  
60

- 1  
2  
3  
4 1 **Ethics approval statement** This study was a meta-analysis of previously published literatures, ethical approval  
5  
6 2 was not necessary.  
7  
8  
9 3 **Competing interests** None declared.  
10  
11 4 **Patient and public involvement** Patients and/or the public were not involved in the design, or conduct, or reporting,  
12  
13 5 or dissemination plans of this research.  
14  
15 6 **Patient consent for publication** Not applicable.  
16  
17 7 **Provenance and peer review** Not commissioned; externally peer reviewed.  
18  
19 8 **Data availability statement** All data relevant to the study are included in the article or uploaded as supplementary  
20  
21 9 information.  
22  
23 10 **Supplemental material** This content has been supplied by the author(s). It has not been vetted by BMJ Publishing  
24  
25 11 Group Limited (BMJ) and may not have been peer-reviewed. Any opinions or recommendations discussed are solely  
26  
27 12 those of the author(s) and are not endorsed by BMJ. BMJ disclaims all liability and responsibility arising from any  
28  
29 13 reliance placed on the content. Where the content includes any translated material, BMJ does not warrant the  
30  
31 14 accuracy and reliability of the translations (including but not limited to local regulations, clinical guidelines,  
32  
33 15 terminology, drug names and drug dosages), and is not responsible for any error and/or omissions arising from  
34  
35 16 translation and adaptation or otherwise.  
36  
37 17 **Open access** This is an open access article distributed in accordance with the Creative Commons Attribution Non  
38  
39 18 Commercial (CC BY-NC 4.0) license, which permits others to distribute, remix, adapt, build upon this work non-  
40  
41 19 commercially, and license their derivative works on different terms, provided the original work is properly cited,  
42  
43 20 appropriate credit is given, any changes made indicated, and the use is non-commercial.  
44  
45 21 See: <http://creativecommons.org/licenses/by-nc/4.0/>.  
46  
47 22 **ORCID** Jianli Li: <https://orcid.org/0000-0001-6867-7825>  
48  
49  
50  
51  
52  
53  
54  
55  
56  
57  
58  
59  
60



1  
2  
3  
4 **1 REFERENCES**

- 5  
6 2 1. Gao W, Zhang L, Han X, et al. 2022. Transcutaneous Electrical Acupoint Stimulation  
7  
8  
9 3 Decreases the Incidence of Postoperative Nausea and Vomiting After Laparoscopic  
10  
11 4 Non-gastrointestinal Surgery: A Multi-Center Randomized Controlled Trial. *Front Med*  
12  
13 *(Lausanne)* 9:766244. <https://doi.org/10.3389/fmed.2022.766244>  
14  
15  
16 6 2. Gan TJ, Belani KG, Bergese S, et al. 2020. Fourth Consensus Guidelines for the  
17  
18 7 Management of Postoperative Nausea and Vomiting. *Anesth Analg* 131:411-48.  
19  
20  
21 8 <https://doi.org/10.1213/ane.0000000000004833>  
22  
23  
24 9 3. Ishikawa E, Iwamoto R, Hojo T, et al. 2022. Cross-sectional Study of PONV Risk  
25  
26 10 Factors for Oral Surgery After Intubated General Anesthesia With Total Intravenous  
27  
28 11 Anesthesia. *Anesth Prog* 69:18-23. <https://doi.org/10.2344/anpr-68-03-12>  
29  
30  
31 12 4. Elvir-Lazo OL, White PF, Yumul R, et al. 2020. Management strategies for the  
32  
33 13 treatment and prevention of postoperative/postdischarge nausea and vomiting: an  
34  
35 14 updated review. *F1000Res* 9. <https://doi.org/10.12688/f1000research.21832.1>  
36  
37  
38 15 5. Zhao Y, He J, Yu N, et al. 2020. Mechanisms of Dexmedetomidine in Neuropathic Pain.  
39  
40 16 *Front Neurosci* 14:330. <https://doi.org/10.3389/fnins.2020.00330>  
41  
42  
43 17 6. Adler AC, Daszkowski A, Tan JC, et al. 2021. The Association of Dexmedetomidine on  
44  
45 18 Perioperative Opioid Consumption in Children Undergoing Adenotonsillectomy With  
46  
47 19 and Without Obstructive Sleep Apnea. *Anesth Analg* 133:1260-8.  
48  
49 20 <https://doi.org/10.1213/ane.0000000000005410>  
50  
51  
52 21 7. Liu Y, Zhao G, Zang X, et al. 2021. Effect of dexmedetomidine on opioid consumption  
53  
54 22 and pain control after laparoscopic cholecystectomy: a meta-analysis of randomized  
55  
56  
57  
58  
59  
60

- 1  
2  
3  
4 1 controlled trials. *Wideochir Inne Tech Maloinwazyjne* 16:491-500.  
5  
6 2 <https://doi.org/10.5114/wiitm.2021.104197>  
7  
8  
9 3 8. Li HJ, Liu S, Geng ZY, et al. 2020. Adding dexmedetomidine to morphine-based  
10  
11 4 analgesia reduces early postoperative nausea in patients undergoing gynecological  
12  
13 5 laparoscopic surgery: a randomized controlled trial. *BMC Anesthesiol* 20:11.  
14  
15 6 <https://doi.org/10.1186/s12871-019-0928-y>  
16  
17  
18 7 9. Lee J, Hwang HW, Jeong JY, et al. 2022. The Effect of Low-Dose Dexmedetomidine  
19  
20 8 on Pain and Inflammation in Patients Undergoing Laparoscopic Hysterectomy. *J Clin*  
21  
22 9 *Med* 11. <https://doi.org/10.3390/jcm11102802>  
23  
24  
25 10 10. Xie C, Zhang C, Sun H, et al. 2021. Effects of Dexmedetomidine on Postoperative  
26  
27 11 Nausea and Vomiting in Adult Patients Undergoing Ambulatory Thyroidectomy: A  
28  
29 12 Randomized Clinical Trial. *Front Med (Lausanne)* 8:781689.  
30  
31 13 <https://doi.org/10.3389/fmed.2021.781689>  
32  
33  
34 14 11. Yan C, Ti-jun D. 2021. Effects of Intraoperative Dexmedetomidine Infusion on  
35  
36 15 Postoperative Delirium in Elderly Patients Undergoing Total Hip Arthroplasty.  
37  
38 16 *International Surgery* 105:328-35. <https://doi.org/10.9738/int surg-d-17-00029.1>  
39  
40  
41 17 12. Page MJ, McKenzie JE, Bossuyt PM, et al. 2021. The PRISMA 2020 statement: an  
42  
43 18 updated guideline for reporting systematic reviews. *Syst Rev* 10:89.  
44  
45 19 <https://doi.org/10.1186/s13643-021-01626-4>  
46  
47  
48 20 13. Gloor Y, Czarnetzki C, Curtin F, et al. 2021. Genetic Susceptibility Toward Nausea and  
49  
50 21 Vomiting in Surgical Patients. *Front Genet* 12:816908.  
51  
52 22 <https://doi.org/10.3389/fgene.2021.816908>  
53  
54  
55  
56  
57  
58  
59  
60

- 1  
2  
3  
4 14. Lu H, Zheng C, Liang B, et al. 2021. Mechanism and risk factors of nausea and vomiting  
5  
6 after TACE: a retrospective analysis. *BMC Cancer* 21:513.  
7  
8  
9 3 <https://doi.org/10.1186/s12885-021-08253-1>  
10  
11  
12 4 15. Liang X, Zhou M, Feng JJ, et al. 2015. Efficacy of dexmedetomidine on postoperative  
13  
14 nausea and vomiting: a meta-analysis of randomized controlled trials. *Int J Clin Exp*  
15  
16 *Med* 8:8450-71.  
17  
18  
19 7 16. Poon YY, Ke TY, Hung KC, et al. 2021. Risk Factors of Postoperative Vomiting in the  
20  
21 Eye of "Real-World Evidence"-Modifiable and Clinical Setting-Dependent Risk Factors  
22  
23 in Surgical Trauma Patients. *J Pers Med* 11. <https://doi.org/10.3390/jpm11050386>  
24  
25  
26  
27 10 17. Konno D, Sugino S, Shibata TF, et al. 2022. Antiemetic effects of baclofen in a shrew  
28  
29 model of postoperative nausea and vomiting: Whole-transcriptome analysis in the  
30  
31 nucleus of the solitary tract. *CNS Neurosci Ther* 28:922-31.  
32  
33  
34 13 <https://doi.org/10.1111/cns.13823>  
35  
36  
37  
38 14 18. Zhang J, Yu Y, Miao S, et al. 2019. Effects of peri-operative intravenous administration  
39  
40 of dexmedetomidine on emergence agitation after general anesthesia in adults: a meta-  
41  
42 analysis of randomized controlled trials. *Drug Des Devel Ther* 13:2853-64.  
43  
44  
45 17 <https://doi.org/10.2147/DDDT.S207016>  
46  
47  
48 18 19. Chen R, Kang Z, Wang Y, et al. 2021. The Anti-inflammatory Effect of  
49  
50 Dexmedetomidine Administration on Patients Undergoing Intestinal Surgery: A  
51  
52 Randomized Study. *Drugs R D* 21:445-53. [https://doi.org/10.1007/s40268-021-00368-](https://doi.org/10.1007/s40268-021-00368-x)  
53  
54  
55 21 [x](#)  
56  
57  
58 22 20. Wu S, Yao H, Cheng N, et al. 2019. Determining whether dexmedetomidine provides  
59  
60

- 1  
2  
3  
4 1 a reno-protective effect in patients receiving laparoscopic radical prostatectomy: a pilot  
5  
6  
7 2 study. *Int Urol Nephrol* 51:1553-61. <https://doi.org/10.1007/s11255-019-02171-9>  
8  
9 3 21. Xu S, Hu S, Ju X, et al. 2021. Effects of intravenous lidocaine, dexmedetomidine, and  
10  
11 4 their combination on IL-1, IL-6 and TNF- $\alpha$  in patients undergoing laparoscopic  
12  
13 5 hysterectomy: a prospective, randomized controlled trial. *BMC Anesthesiol* 21:3.  
14  
15  
16 6 <https://doi.org/10.1186/s12871-020-01219-z>  
17  
18  
19 7 22. Zhang W, Wang R, Li B, et al. 2022. The Effect of Dexmedetomidine on Postoperative  
20  
21 8 Nausea and Vomiting in Patients Undergoing Thoracic Surgery-A Meta-Analysis of a  
22  
23 9 Randomized Controlled Trial. *Front Surg* 9:863249.  
24  
25  
26 10 <https://doi.org/10.3389/fsurg.2022.863249>  
27  
28  
29 11 23. Misra S, Behera BK, Mitra JK, et al. 2021. Effect of preoperative dexmedetomidine  
30  
31 12 nebulization on the hemodynamic response to laryngoscopy and intubation: a  
32  
33 13 randomized control trial. *Korean J Anesthesiol* 74:150-7.  
34  
35  
36 14 <https://doi.org/10.4097/kja.20153>  
37  
38  
39 15 24. Lin C, Tu H, Jie Z, et al. 2021. Effect of Dexmedetomidine on Delirium in Elderly  
40  
41 16 Surgical Patients: A Meta-analysis of Randomized Controlled Trials. *Ann*  
42  
43 17 *Pharmacother* 55:624-36. <https://doi.org/10.1177/1060028020951954>  
44  
45  
46 18 25. Geng ZY, Liu YF, Wang SS, et al. 2016. Intra-operative dexmedetomidine reduces  
47  
48 19 early postoperative nausea but not vomiting in adult patients after gynaecological  
49  
50 20 laparoscopic surgery: A randomised controlled trial. *Eur J Anaesthesiol* 33:761-6.  
51  
52  
53 21 <https://doi.org/10.1097/eja.0000000000000491>  
54  
55  
56 22 26. Li B, Zhao Y, Liu X, et al. 2022. The Optimal Dose of Intraoperative Dexmedetomidine  
57  
58  
59  
60

- 1  
2  
3  
4 1 for Antiemetic Effects of Post-operative Nausea and Vomiting in Patients Undergoing  
5  
6 2 Elective Thoracic Surgery: A Retrospective Cohort Study. *Front Med (Lausanne)*  
7  
8  
9 3 9:891096. <https://doi.org/10.3389/fmed.2022.891096>  
10  
11  
12 4 27. Khan MA, Gupta A, Gupta N, et al. 2021. Efficacy of Palonosetron and Dexamethasone  
13  
14 5 for Prevention of Post-operative Nausea and Vomiting in Female Patients Undergoing  
15  
16 6 Laparoscopic Cholecystectomy: A Prospective Randomised Double-Blind Trial. *Turk J*  
17  
18 7 *Anaesthesiol Reanim* 49:400-6. <https://doi.org/10.5152/tjar.2021.191>  
19  
20  
21  
22 8 28. Serpico VJ, Mone MC, Zhang C, et al. 2022. Preoperative multimodal protocol reduced  
23  
24 9 postoperative nausea and vomiting in patients undergoing mastectomy with  
25  
26 10 reconstruction. *J Plast Reconstr Aesthet Surg* 75:528-35.  
27  
28 11 <https://doi.org/10.1016/j.bjps.2021.09.059>  
29  
30  
31  
32 12 29. Jin S, Liang DD, Chen C, et al. 2017. Dexmedetomidine prevent postoperative nausea  
33  
34 13 and vomiting on patients during general anesthesia: A PRISMA-compliant meta  
35  
36 14 analysis of randomized controlled trials. *Medicine (Baltimore)* 96:e5770.  
37  
38 15 <https://doi.org/10.1097/MD.0000000000005770>  
39  
40  
41  
42

#### 16 **Figure legends**

17 **Figure 1:** The risk of bias of included studies.

18 **Figure 2:** Flow diagram.

19 **Figure 3:** The total effect of dexmedetomidine on PONV.

20 **Figure 4:** Perioperative opioid consumption in dexmedetomidine and control group.

1  
2  
3  
4 1 **Figure 5:** The effect of dexmedetomidine on the length of hospitalization.  
5  
6

7  
8 2 **Figure 6:** The effect of dexmedetomidine on the extubation time.  
9

10  
11 3 **Figure 7:** Incidence of bradycardia in dexmedetomidine and control group.  
12  
13

14  
15 4 **Figure 8:** The funnel plot.  
16  
17  
18  
19  
20  
21  
22  
23  
24  
25  
26  
27  
28  
29  
30  
31  
32  
33  
34  
35  
36  
37  
38  
39  
40  
41  
42  
43  
44  
45  
46  
47  
48  
49  
50  
51  
52  
53  
54  
55  
56  
57  
58  
59  
60

For peer review only

1  
2  
3  
4  
5  
6  
7  
8  
9  
10  
11  
12  
13  
14  
15  
16  
17  
18  
19  
20  
21  
22  
23  
24  
25  
26  
27  
28  
29  
30  
31  
32  
33  
34  
35  
36  
37  
38  
39  
40  
41  
42  
43  
44  
45  
46  
47  
48  
49  
50  
51  
52  
53  
54  
55  
56  
57  
58  
59  
60

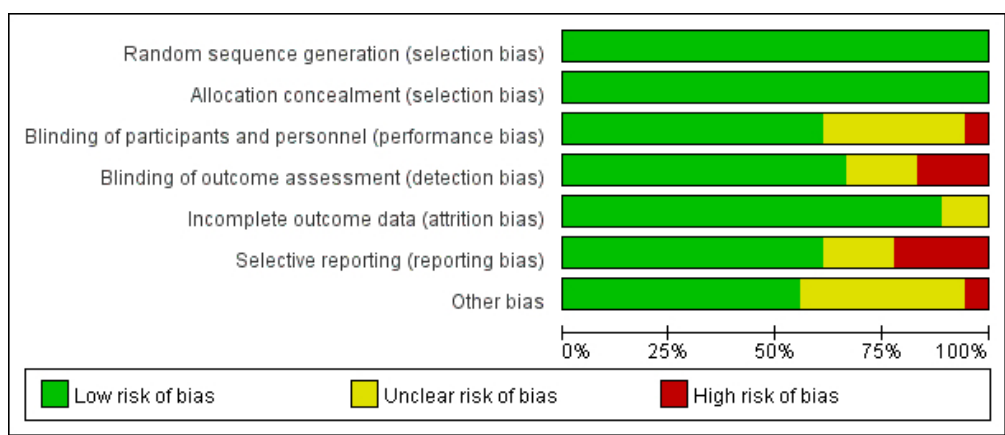

Figure 1: The risk of bias of included studies.

213x90mm (72 x 72 DPI)

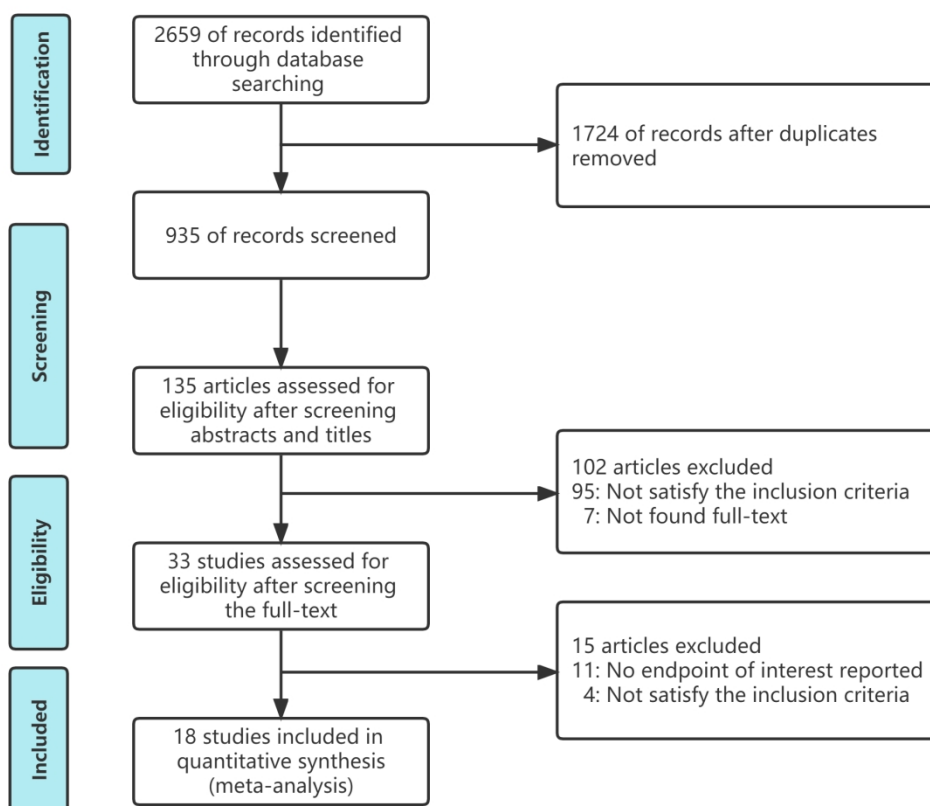

Figure 2: Flow diagram

735x638mm (72 x 72 DPI)



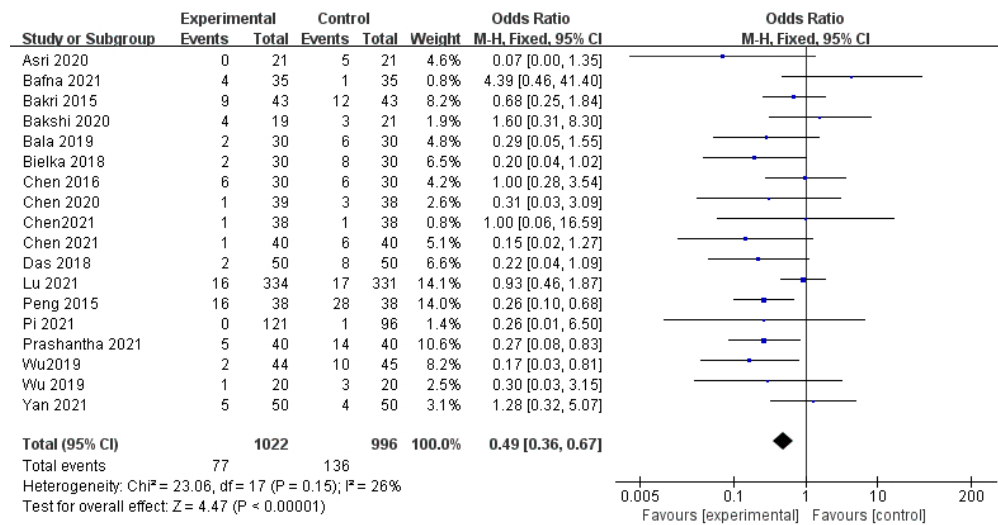

Figure 3: The total effect of dexmedetomidine on postoperative nausea and vomiting.

277x146mm (72 x 72 DPI)

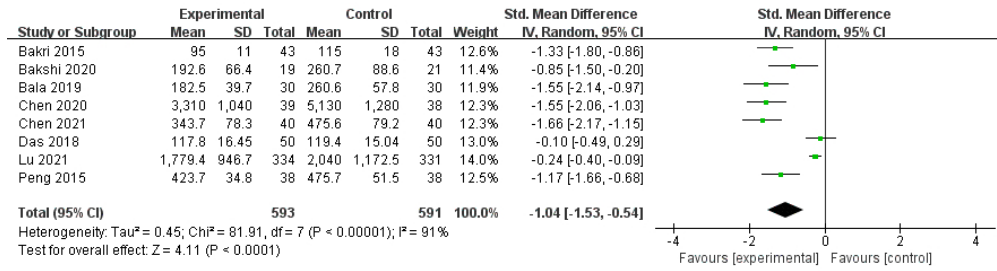

Figure 4: Perioperative opioid consumption in dexmedetomidine and control group.

311x84mm (72 x 72 DPI)

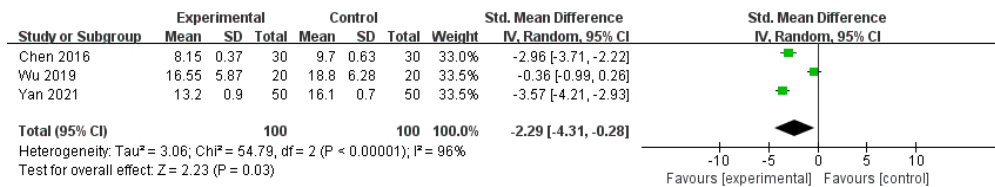

Figure 5: The effect of dexmedetomidine on the length of hospitalization.

300x56mm (72 x 72 DPI)

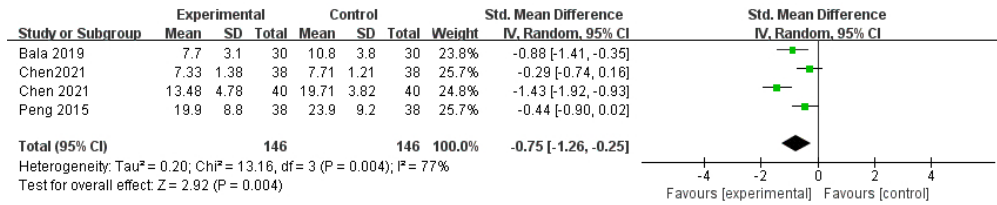

Figure 6: The effect of dexmedetomidine on the extubation time.

300x62mm (72 x 72 DPI)

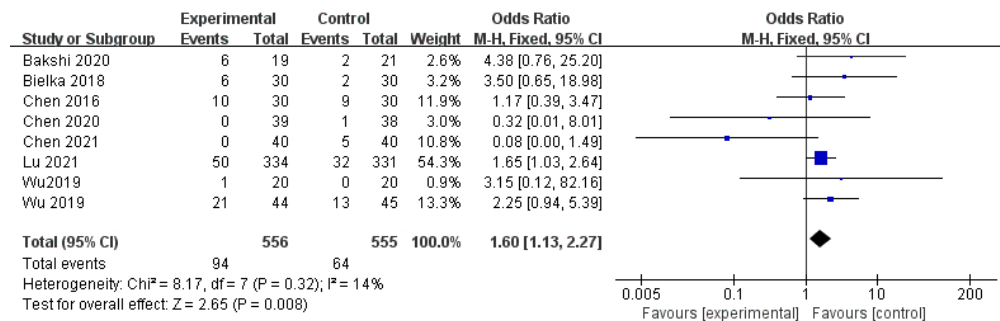

Figure 7: Incidence of bradycardia in dexmedetomidine and control group.

277x90mm (72 x 72 DPI)

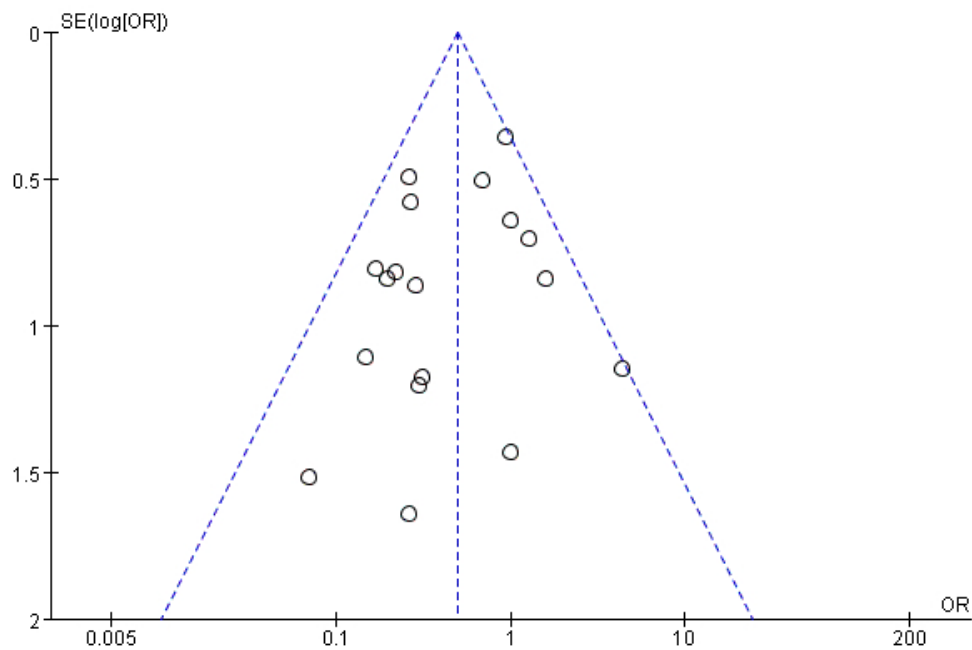

Figure 8: The funnel plot

211x141mm (72 x 72 DPI)

## Supplementary document 1

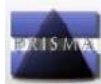

## PRISMA 2020 Checklist

| Section and Topic             | Item # | Checklist item                                                                                                                                                                                                                                                                                       | Location where item is reported |
|-------------------------------|--------|------------------------------------------------------------------------------------------------------------------------------------------------------------------------------------------------------------------------------------------------------------------------------------------------------|---------------------------------|
| <b>TITLE</b>                  |        |                                                                                                                                                                                                                                                                                                      |                                 |
| Title                         | 1      | Identify the report as a systematic review.                                                                                                                                                                                                                                                          | 1                               |
| <b>ABSTRACT</b>               |        |                                                                                                                                                                                                                                                                                                      |                                 |
| Abstract                      | 2      | See the PRISMA 2020 for Abstracts checklist.                                                                                                                                                                                                                                                         | 1                               |
| <b>INTRODUCTION</b>           |        |                                                                                                                                                                                                                                                                                                      |                                 |
| Rationale                     | 3      | Describe the rationale for the review in the context of existing knowledge.                                                                                                                                                                                                                          | 2-3                             |
| Objectives                    | 4      | Provide an explicit statement of the objective(s) or question(s) the review addresses.                                                                                                                                                                                                               | 3                               |
| <b>METHODS</b>                |        |                                                                                                                                                                                                                                                                                                      |                                 |
| Eligibility criteria          | 5      | Specify the inclusion and exclusion criteria for the review and how studies were grouped for the syntheses.                                                                                                                                                                                          | 3                               |
| Information sources           | 6      | Specify all databases, registers, websites, organisations, reference lists and other sources searched or consulted to identify studies. Specify the date when each source was last searched or consulted.                                                                                            | 3,Supplementary document 2      |
| Search strategy               | 7      | Present the full search strategies for all databases, registers and websites, including any filters and limits used.                                                                                                                                                                                 | 3,Supplementary document 2      |
| Selection process             | 8      | Specify the methods used to decide whether a study met the inclusion criteria of the review, including how many reviewers screened each record and each report retrieved, whether they worked independently, and if applicable, details of automation tools used in the process.                     | 3                               |
| Data collection process       | 9      | Specify the methods used to collect data from reports, including how many reviewers collected data from each report, whether they worked independently, any processes for obtaining or confirming data from study investigators, and if applicable, details of automation tools used in the process. | 3-4                             |
| Data items                    | 10a    | List and define all outcomes for which data were sought. Specify whether all results that were compatible with each outcome domain in each study were sought (eg. for all measures, time points, analyses), and if not, the methods used to decide which results to collect.                         | 3-4                             |
|                               | 10b    | List and define all other variables for which data were sought (e.g. participant and intervention characteristics, funding sources). Describe any assumptions made about any missing or unclear information.                                                                                         | 4                               |
| Study risk of bias assessment | 11     | Specify the methods used to assess risk of bias in the included studies, including details of the tool(s) used, how many reviewers assessed each study and whether they worked independently, and if applicable, details of automation tools used in the process.                                    | 4                               |
| Effect measures               | 12     | Specify for each outcome the effect measure(s) (e.g. risk ratio, mean difference) used in the synthesis or presentation of results.                                                                                                                                                                  | 6                               |
| Synthesis methods             | 13a    | Describe the processes used to decide which studies were eligible for each synthesis (e.g. tabulating the study intervention characteristics and comparing against the planned groups for each synthesis (item #5)).                                                                                 | Table 1                         |
|                               | 13b    | Describe any methods required to prepare the data for presentation or synthesis, such as handling of missing summary statistics, or data                                                                                                                                                             | 4                               |

| Section and Topic             | Item # | Checklist item                                                                                                                                                                                                                                                                       | Location where item is reported |
|-------------------------------|--------|--------------------------------------------------------------------------------------------------------------------------------------------------------------------------------------------------------------------------------------------------------------------------------------|---------------------------------|
|                               |        | conversions.                                                                                                                                                                                                                                                                         |                                 |
|                               | 13c    | Describe any methods used to tabulate or visually display results of individual studies and syntheses.                                                                                                                                                                               | 4                               |
|                               | 13d    | Describe any methods used to synthesize results and provide a rationale for the choice(s). If meta-analysis was performed, describe the model(s), method(s) to identify the presence and extent of statistical heterogeneity, and software package(s) used.                          | 4                               |
|                               | 13e    | Describe any methods used to explore possible causes of heterogeneity among study results (e.g. subgroup analysis, meta-regression).                                                                                                                                                 | 4                               |
|                               | 13f    | Describe any sensitivity analyses conducted to assess robustness of the synthesized results.                                                                                                                                                                                         | 4                               |
| Reporting bias assessment     | 14     | Describe any methods used to assess risk of bias due to missing results in a synthesis (arising from reporting biases).                                                                                                                                                              | 4                               |
| Certainty assessment          | 15     | Describe any methods used to assess certainty (or confidence) in the body of evidence for an outcome.                                                                                                                                                                                | 4                               |
| <b>RESULTS</b>                |        |                                                                                                                                                                                                                                                                                      |                                 |
| Study selection               | 16a    | Describe the results of the search and selection process, from the number of records identified in the search to the number of studies included in the review, ideally using a flow diagram.                                                                                         | 4                               |
|                               | 16b    | Cite studies that might appear to meet the inclusion criteria, but which were excluded, and explain why they were excluded.                                                                                                                                                          | 4                               |
| Study characteristics         | 17     | Cite each included study and present its characteristics.                                                                                                                                                                                                                            | 4                               |
| Risk of bias in studies       | 18     | Present assessments of risk of bias for each included study.                                                                                                                                                                                                                         | 6, Figure 8                     |
| Results of individual studies | 19     | For all outcomes, present, for each study: (a) summary statistics for each group (where appropriate) and (b) an effect estimate and its precision (e.g. confidence/credible interval), ideally using structured tables or plots.                                                     | 5                               |
| Results of syntheses          | 20a    | For each synthesis, briefly summarise the characteristics and risk of bias among contributing studies.                                                                                                                                                                               | 5-6                             |
|                               | 20b    | Present results of all statistical syntheses conducted. If meta-analysis was done, present for each the summary estimate and its precision (e.g. confidence/credible interval) and measures of statistical heterogeneity. If comparing groups, describe the direction of the effect. | 5-6                             |
|                               | 20c    | Present results of all investigations of possible causes of heterogeneity among study results.                                                                                                                                                                                       | 5-6                             |
|                               | 20d    | Present results of all sensitivity analyses conducted to assess the robustness of the synthesized results.                                                                                                                                                                           | Supplementary document 3        |
| Reporting biases              | 21     | Present assessments of risk of bias due to missing results (arising from reporting biases) for each synthesis assessed.                                                                                                                                                              | 6                               |
| Certainty of evidence         | 22     | Present assessments of certainty (or confidence) in the body of evidence for each outcome assessed.                                                                                                                                                                                  | -                               |
| <b>DISCUSSION</b>             |        |                                                                                                                                                                                                                                                                                      |                                 |
| Discussion                    | 23a    | Provide a general interpretation of the results in the context of other evidence.                                                                                                                                                                                                    | 6                               |
|                               | 23b    | Discuss any limitations of the evidence included in the review.                                                                                                                                                                                                                      | 8                               |



1  
2  
3  
4  
5  
6  
7  
8  
9  
10  
11  
12  
13  
14  
15  
16  
17  
18  
19  
20  
21  
22  
23  
24  
25  
26  
27  
28  
29  
30  
31  
32  
33  
34  
35  
36  
37  
38  
39  
40  
41  
42  
43  
44  
45  
46

| Section and Topic                              | Item # | Checklist item                                                                                                                                                                                                                             | Location where item is reported |
|------------------------------------------------|--------|--------------------------------------------------------------------------------------------------------------------------------------------------------------------------------------------------------------------------------------------|---------------------------------|
|                                                | 23c    | Discuss any limitations of the review processes used.                                                                                                                                                                                      | 8                               |
|                                                | 23d    | Discuss implications of the results for practice, policy, and future research.                                                                                                                                                             | 8                               |
| <b>OTHER INFORMATION</b>                       |        |                                                                                                                                                                                                                                            |                                 |
| Registration and protocol                      | 24a    | Provide registration information for the review, including register name and registration number, or state that the review was not registered.                                                                                             | -                               |
|                                                | 24b    | Indicate where the review protocol can be accessed, or state that a protocol was not prepared.                                                                                                                                             | -                               |
|                                                | 24c    | Describe and explain any amendments to information provided at registration or in the protocol.                                                                                                                                            | -                               |
| Support                                        | 25     | Describe sources of financial or non-financial support for the review, and the role of the funders or sponsors in the review.                                                                                                              | Title page                      |
| Competing interests                            | 26     | Declare any competing interests of review authors.                                                                                                                                                                                         | Title page                      |
| Availability of data, code and other materials | 27     | Report which of the following are publicly available and where they can be found: template data collection forms; data extracted from included studies; data used for all analyses; analytic code; any other materials used in the review. | Title page                      |

From: Page MJ, McKenzie JE, Bossuyt PM, Boutron I, Hoffmann TC, Mulrow CD, et al. The PRISMA 2020 statement: an updated guideline for reporting systematic reviews. BMJ 2021;372:n71. doi: 10.1136/bmj.n71

For more information, visit: <http://www.prisma-statement.org/>

## Supplementary document 2: The search strategy

### Pubmed

Search: (DEX[Title/Abstract]) OR ("Dexmedetomidine"[Mesh]) OR (Dexmedetomidine[Title/Abstract]) AND ("Postoperative Nausea and Vomiting"[Mesh]) OR (((((((((PONV[Title/Abstract]) OR (Nausea[Title/Abstract] AND Vomiting, Postoperative[Title/Abstract])) OR (Vomiting, Postoperative[Title/Abstract])) OR (Postoperative Emesis[Title/Abstract])) OR (Postoperative Vomiting[Title/Abstract])) OR (Emesis, Postoperative[Title/Abstract])) OR (Emeses, Postoperative[Title/Abstract])) OR (Postoperative Emeses[Title/Abstract])) OR (Postoperative Nausea[Title/Abstract])) OR (Nausea, Postoperative[Title/Abstract]))

### Embase

- #1 Dexmedetomidine
- #2 'mpv-1440':ab,ti OR 'mpv 1440':ab,ti OR 'mpv1440':ab,ti OR 'precedex':ab,ti OR 'dexmedetomidine hydrochloride':ab,ti OR 'hydrochloride, dexmedetomidine':ab,ti
- #3 #1 OR #2
- #4 postoperative AND nausea AND vomiting
- #5 'ponv':ab,ti OR 'nausea and vomiting, postoperative':ab,ti OR 'vomiting, postoperative':ab,ti OR 'postoperative emesis':ab,ti OR 'postoperative vomiting':ab,ti OR 'emesis, postoperative':ab,ti OR 'emeses, postoperative':ab,ti OR 'postoperative emeses':ab,ti OR 'postoperative nausea':ab,ti OR 'nausea, postoperative':ab,ti
- #6 #4 OR #5
- #7 #3 AND #6

### Cochrane

- #1 Dexmedetomidine
- #2 (MPV-1440):ti,ab,kw OR (MPV 1440):ti,ab,kw OR (MPV1440):ti,ab,kw OR (Precedex):ti,ab,kw OR (Dexmedetomidine Hydrochloride):ti,ab,kw OR (Hydrochloride, Dexmedetomidine):ti,ab,kw
- #3 #1 OR #2
- #4 Postoperative nausea and vomiting
- #5 (PONV):ti,ab,kw OR (Nausea and Vomiting, Postoperative):ti,ab,kw OR (Vomiting, Postoperative):ti,ab,kw OR (Postoperative Emesis):ti,ab,kw OR (Postoperative Vomiting):ti,ab,kw OR (Emesis, Postoperative):ti,ab,kw OR (Emeses, Postoperative):ti,ab,kw OR (Postoperative Emeses):ti,ab,kw OR (Postoperative Nausea):ti,ab,kw OR (Nausea, Postoperative):ti,ab,kw
- #6 #4 OR #5
- #7 #3 AND #6

**Supplementary document 3: The sensitivity analysis of effect of dexmedetomidine on PONV**

| Study                       | Odds Ratio  | 95% CI              |
|-----------------------------|-------------|---------------------|
| Omitting Asri 2020          | 0.51        | [0.37, 0.70]        |
| Omitting Bafna 2021         | 0.46        | [0.33, 0.63]        |
| Omitting Bakri 2015         | 0.47        | [0.34, 0.66]        |
| Omitting Bakshi 2020        | 0.47        | [0.34, 0.64]        |
| Omitting Bala 2019          | 0.50        | [0.36, 0.69]        |
| Omitting Bielka 2018        | 0.51        | [0.37, 0.70]        |
| Omitting Chen 2016          | 0.47        | [0.34, 0.65]        |
| Omitting Chen 2020          | 0.49        | [0.36, 0.68]        |
| Omitting Chen2021           | 0.49        | [0.35, 0.67]        |
| Omitting Chen 2021          | 0.51        | [0.37, 0.70]        |
| Omitting Das 2018           | 0.51        | [0.37, 0.70]        |
| Omitting Lu 2021            | 0.42        | [0.29, 0.60]        |
| Omitting Peng 2015          | 0.53        | [0.38, 0.73]        |
| Omitting Pi 2021            | 0.49        | [0.36, 0.68]        |
| Omitting Prashantha 2021    | 0.52        | [0.37, 0.72]        |
| Omitting Wu2019             | 0.52        | [0.38, 0.71]        |
| Omitting Wu 2019            | 0.49        | [0.36, 0.68]        |
| Omitting Yan 2021           | 0.46        | [0.34, 0.64]        |
| <b>Random effects model</b> | <b>0.48</b> | <b>[0.32, 0.73]</b> |

# BMJ Open

## The effect of dexmedetomidine on postoperative nausea and vomiting in patients under general anesthesia: an updated meta-analysis of randomized controlled trials

|                                 |                                                                                                                                                                                                                                                                                                                                                                                                                                                                                                                                                                                                                                                            |
|---------------------------------|------------------------------------------------------------------------------------------------------------------------------------------------------------------------------------------------------------------------------------------------------------------------------------------------------------------------------------------------------------------------------------------------------------------------------------------------------------------------------------------------------------------------------------------------------------------------------------------------------------------------------------------------------------|
| Journal:                        | <i>BMJ Open</i>                                                                                                                                                                                                                                                                                                                                                                                                                                                                                                                                                                                                                                            |
| Manuscript ID                   | bmjopen-2022-067102.R1                                                                                                                                                                                                                                                                                                                                                                                                                                                                                                                                                                                                                                     |
| Article Type:                   | Original research                                                                                                                                                                                                                                                                                                                                                                                                                                                                                                                                                                                                                                          |
| Date Submitted by the Author:   | 27-Dec-2022                                                                                                                                                                                                                                                                                                                                                                                                                                                                                                                                                                                                                                                |
| Complete List of Authors:       | Zhao, Weihong; Hebei General Hospital, Department of Anesthesiology<br>Li, Jianli; Hebei General Hospital, Department of Anesthesiology<br>Wang, Na; Hebei General Hospital, Department of Rheumatology<br>Wang, Zhibin; The Fifth People's Hospital of Hengshui, Department of Anesthesiology<br>Zhang, Meng; Hebei General Hospital, Department of Anesthesiology<br>Zhang, Huanhuan; Hebei General Hospital, Department of Anesthesiology<br>Liu, Meinu; Hebei General Hospital, Department of Anesthesiology<br>He, Jinhua; Hebei General Hospital, Department of Anesthesiology<br>Yu, Dongdong; Hebei General Hospital, Department of Anesthesiology |
| <b>Primary Subject Heading</b>: | Anaesthesia                                                                                                                                                                                                                                                                                                                                                                                                                                                                                                                                                                                                                                                |
| Secondary Subject Heading:      | Anaesthesia, Surgery                                                                                                                                                                                                                                                                                                                                                                                                                                                                                                                                                                                                                                       |
| Keywords:                       | ANAESTHETICS, Adult anaesthesia < ANAESTHETICS, Adult surgery < SURGERY, Adverse events < THERAPEUTICS                                                                                                                                                                                                                                                                                                                                                                                                                                                                                                                                                     |
|                                 |                                                                                                                                                                                                                                                                                                                                                                                                                                                                                                                                                                                                                                                            |

SCHOLARONE™  
Manuscripts



I, the Submitting Author has the right to grant and does grant on behalf of all authors of the Work (as defined in the below author licence), an exclusive licence and/or a non-exclusive licence for contributions from authors who are: i) UK Crown employees; ii) where BMJ has agreed a CC-BY licence shall apply, and/or iii) in accordance with the terms applicable for US Federal Government officers or employees acting as part of their official duties; on a worldwide, perpetual, irrevocable, royalty-free basis to BMJ Publishing Group Ltd ("BMJ") its licensees and where the relevant Journal is co-owned by BMJ to the co-owners of the Journal, to publish the Work in this journal and any other BMJ products and to exploit all rights, as set out in our [licence](#).

The Submitting Author accepts and understands that any supply made under these terms is made by BMJ to the Submitting Author unless you are acting as an employee on behalf of your employer or a postgraduate student of an affiliated institution which is paying any applicable article publishing charge ("APC") for Open Access articles. Where the Submitting Author wishes to make the Work available on an Open Access basis (and intends to pay the relevant APC), the terms of reuse of such Open Access shall be governed by a Creative Commons licence – details of these licences and which [Creative Commons](#) licence will apply to this Work are set out in our licence referred to above.

Other than as permitted in any relevant BMJ Author's Self Archiving Policies, I confirm this Work has not been accepted for publication elsewhere, is not being considered for publication elsewhere and does not duplicate material already published. I confirm all authors consent to publication of this Work and authorise the granting of this licence.

1           **The effect of dexmedetomidine on postoperative nausea and**  
2           **vomiting in patients under general anesthesia: an updated meta-**  
3           **analysis of randomized controlled trials**

4           **Weihong ZHAO, MD<sup>1</sup>, Jianli LI, PhD<sup>1</sup>, Na WANG, MD<sup>2</sup>, Zhibin WANG, MD<sup>3</sup>,**  
5           **Meng ZHANG, MD <sup>1</sup>, Huanhuan ZHANG, MD <sup>1</sup>, Meinv LIU, MD <sup>1</sup>, Jinhua HE,**  
6           **MD <sup>1</sup>, Dongdong YU, MD <sup>1</sup>**

7           <sup>1</sup> Department of Anesthesiology, Hebei General Hospital, Shijiazhuang 050000, Hebei  
8           Province, China

9           <sup>2</sup> Department of Rheumatology, Hebei General Hospital, Shijiazhuang 050000, Hebei  
10          Province, China

11          <sup>3</sup> Department of Anesthesiology, The Fifth People's Hospital of Hengshui, Hengshui,  
12          053000, Hebei Province, China.

13          **Corresponding author and correspondence to:**

14          Jianli Li, PhD.

15          Department of Anesthesiology, Hebei General Hospital,  
16          Shijiazhuang, China

17          E-mail: [hblijianli@163.com](mailto:hblijianli@163.com)

18          **Keywords:** Dexmedetomidine, Perioperative period, Postoperative nausea and  
19          vomiting, Side effects, Meta-analysis

20          **Word Counts**

21          Main text: 2907 words (Excluding title page, references, figures and tables)

## 1 ABSTRACT

2 **Objectives:** To explore the effect of dexmedetomidine on postoperative nausea and vomiting in  
3 adult patients after general anesthesia.

4 **Design:** Systematic review and meta-analysis.

5 **Eligibility criteria for selecting studies:** Randomized controlled trials comparing the efficacy of  
6 dexmedetomidine with placebo or a single drug on postoperative nausea and vomiting in adult  
7 patients after general anesthesia.

8 **Data Sources:** We searched the PubMed, the Web of Science, the Cochrane Library and Embase  
9 (January 1, 2000, to June 30, 2022) to select the relevant randomized controlled trials (RCTs).

10 **Data analysis:** All the relevant data were analyzed by using RevManV.5.4. Heterogeneity was  
11 tested for each outcome, and random effect or fixed effect models was selected according to the  
12 level of heterogeneity. The primary outcome was the incidence of postoperative nausea and  
13 vomiting. The second outcomes were the incidence of bradycardia, perioperative opioid  
14 consumption, extubation time and the length of hospitalization.

15 **Results:** In total of 18 trials involving 2018 patients were included in this meta-analysis. Notably,  
16 15 updated studies were not involved in the previous meta-analysis. The incidence of postoperative  
17 nausea and vomiting in dexmedetomidine group was lower than that in control group (odds ratio  
18 [OR] =0.49, 95% CI 0.36 to 0.67) and the perioperative opioid consumption in dexmedetomidine  
19 group was also decreased significantly (standard mean difference [SMD] = -1.04, 95% CI -1.53 to  
20 -0.54). Moreover, the length of hospitalization (SMD= -2.29, 95% CI -4.31 to -0.28) and the  
21 extubation time (SMD= -0.75, 95% CI -1.26 to -0.25) in dexmedetomidine group were shorter.  
22 Whereas, more number of patients receiving dexmedetomidine occurred bradycardia (OR=1.60, 95%

1  
2  
3  
4 1 CI 1.13 to 2.27).

5  
6 2 **Conclusions:** Dexmedetomidine could decrease the occurrence of postoperative nausea and  
7  
8  
9 3 vomiting in adult patients under general anesthesia and promote the recovery after surgery. However,  
10  
11 4 dexmedetomidine might increase the occurrence of bradycardia.

12  
13  
14 5 **PROSPERO registration number:** CRD 42022341548

#### 15 16 17 6 **Strengths and limitations of this study**

- 18  
19 7 ● An up-to-date assessment of the effectiveness of dexmedetomidine on postoperative nausea  
20  
21 8 and vomiting.
- 22  
23 9 ● We excluded studies that DEX compared with opioids agents in our meta-analysis to eliminate  
24  
25 10 the effect of opioids on postoperative nausea and vomiting.
- 26  
27 11 ● The main limitation of this review was that varied quality and heterogeneity of included studies  
28  
29 12 might affect the certainty of meta-analysis.

#### 30 31 32 13 **INTRODUCTION**

33  
34  
35 14 Postoperative nausea and vomiting (PONV), as a familiar negative events after operation, is  
36  
37 15 known as nausea, vomiting, or retching within one day after operation, which may be due to the  
38  
39 16 effect of anesthetics on the emetic control center in the medulla oblongata[1]. The incidence of  
40  
41 17 PONV is about 30% and even rising to 60%-80% in high-risk populations. PONV, an extreme poor  
42  
43 18 medical experience for patients undergoing general anesthetic surgery, leads to many adverse  
44  
45 19 influences including stomach discomfort, dehydration, water-electrolyte disorders, wound  
46  
47 20 dehiscence, esophageal injury, reflux and aspiration, which extend the time of hospitalization and  
48  
49 21 increase the medical costs[2]. Fortunately, prophylactic antiemetic agents could decrease the  
50  
51 22 happening of PONV. However, these drugs produce some side effects including headache,  
52  
53  
54  
55  
56  
57  
58  
59  
60



1  
2  
3  
4 1 restlessness, dry mouth, hypotension and cardiovascular complications, which limit their use in  
5  
6 2 some cases[3]. Therefore, exploring suitable drugs and methods to prevent and treat PONV is  
7  
8  
9 3 necessary.

10  
11 4 Dexmedetomidine (DEX), as a new adrenal  $\alpha_2$  receptor agonist with high selectivity, has  
12  
13  
14 5 sedation, hypnosis and analgesia effects without respiratory depression, which is widely used in  
15  
16  
17 6 perioperative period. These characteristics have enabled DEX to be a multifunctional drug in the  
18  
19  
20 7 presentments of numerous negative events during anesthesia. For the last few years, the effect of  
21  
22  
23 8 DEX on PONV attracted increasing attention from anesthesiologists. One clinical study reported  
24  
25  
26 9 that postoperative administration of DEX, as patient-controlled analgesia (PCA) regimen, produced  
27  
28  
29 10 early antiemetic effects[4]. Another research indicated that intravenous DEX could prevent the  
30  
31  
32 11 occurrence of PONV in adult patients after laparoscopic hysterectomy[5]. While different results  
33  
34  
35 12 were observed in the similar articles[6; 7]. Therefore, it is still disputed whether intraoperative use  
36  
37  
38 13 of DEX can ameliorate the occurrence of PONV in patients after general anesthesia.

39  
40 14 As far as we know, no updated analysis of the data about the effect of DEX on PONV was  
41  
42  
43 15 performed during general anesthesia. Therefore, in order to obtain the most recent proof, we  
44  
45  
46 16 thoroughly evaluated the effect of intraoperative use of DEX on PONV in adult patients  
47  
48  
49 17 experiencing general anesthesia according to the results from the 18 randomized controlled trials  
50  
51  
52 18 (RCTs) in our meta-analysis.

## 53 19 **METHODS**

### 54 20 **Patient and public involvement**

55  
56 21 No patient involved.

### 57 58 22 **Registration**

1 This meta-analysis was prepared by following the criteria as outlined in the PRISMA  
2 guidelines[8] (Supplementary document 1). The meta-analysis was registered on PROSPERO  
3 (registry number: CRD 42022341548).

#### 4 **Search strategy**

5 Two investigators independently searched for articles published in PubMed, the Web of  
6 Science, Embase, and the Cochrane Library. The complete search strategy protocol was shown in  
7 Supplementary document 2. In order to ensure the contemporary practice, the literature was  
8 searched from January 1, 2000 to June 30, 2022.

#### 9 **Inclusion and exclusion criteria**

10 The inclusion criteria were in accordance with PICO[9]:

11 Patients: Adult participants undergoing general anesthetic surgery;

12 Intervention: received a single or continuously-administered intravenous dose of intraoperative  
13 DEX;

14 Comparison: received a single or continuously-administered intravenous injection of placebo  
15 or comparator;

16 Outcomes: the incidence of PONV and bradycardia, the perioperative opioid consumption, the  
17 extubation time and the length of hospitalization.

18 The reviews, abstracts, case reports or duplicates were excluded. Additionally, some RCTs  
19 meeting the following criteria were also excluded (1) Drug/drugs (including DEX) versus  
20 combinational drugs; (2) DEX compared with opioids agents; (3) Adult patients undergoing surgery  
21 under local or spinal-epidural anesthesia; (4) Full text not available.

#### 22 **Data extraction and analysis**

1 All information of the articles was collected independently by two researchers using  
2 standardized forms. Any problems were decided by a third author in order to discuss and reach an  
3 agreement. The corresponding data were collected: first author, type of surgery, publication year,  
4 number of patients, administrations for patients, the incidence of PONV and bradycardia, the  
5 perioperative opioid consumption, the extubation time and the length of hospitalization. A  
6 standardized Excel file was used to save the extracted data. And all the data were pooled together.  
7 Studies were excluded when the primary outcome was not clearly reported with quantifiable data or  
8 it was not possible to extract and calculate the appropriate data from the published results.

### 9 **Risk of bias assessment**

10 In accordance with the Cochrane risk-of-bias tool[10], the risk of bias in the included articles  
11 were evaluated by two authors independently (Figure 1). According to the following criteria: bias  
12 from selection, performance, detection, attrition, reporting and other, we reviewed and scored each  
13 study as "high", "unclear", and "low".

### 14 **Statistical analysis**

15 We used the Review Manager 5.4 software to perform statistical analysis. For dichotomous  
16 data, we calculated odds ratios (ORs) with 95% confidence intervals (CIs). And when the outcome  
17 was expressed using varied approaches, we used standardized mean difference (SMD) and 95% CIs  
18 to analyze the continuous data. We used the *I*-square ( $I^2$ ) test to evaluate the heterogeneity of  
19 included studies. A random effects model was chosen when  $I^2 \geq 50\%$ , otherwise a fixed effect model  
20 was selected. Funnel plots were used for quality assessment of bias. And the sensitivity analysis was  
21 performed by removing these studies and observing the consistency for this meta-analysis involving  
22 at least 10 trials.

## 1       2       3       4       5       6       7       8       9       10       11       12       13       14       15       16       17       18       19       20       21       22       23       24       25       26       27       28       29       30       31       32       33       34       35       36       37       38       39       40       41       42       43       44       45       46       47       48       49       50       51       52       53       54       55       56       57       58       59       60

# 1       **RESULTS**

### 2       **Study selection**

3           The procedure of article screening, selection of articles, and the causes for exclusion were  
4       displayed in the flow diagram (Figure 2). The initial search included 2659 documents, and after  
5       taking out the duplicates and checking the abstracts and titles, 33 trials were considered potentially  
6       eligible. After carefully reading the full-text studies, 18 studies were eventually included, of which  
7       15 studies were new articles appearing after the previously published meta-analyses.

### 8       **Study characteristics**

9           The main characteristics of the 18 articles were summed up in Table 1. 16 articles in the  
10       included studies investigated the efficacy of DEX compared to saline, 2 trials examined the efficacy  
11       of DEX compared to clonidine and dexamethasone, respectively. The 18 articles including a total  
12       of 2018 patients in this meta-analysis were published from 2015 to 2021 with sample sizes varying  
13       from 19 to 334 participants.

Table 1: Characteristics of the included trials.

| Author      | Year | Age (yr)    |             | Gender male/female | Sample size | Type of surgery                             | Administration mode                                               | Comparisons            | Numbers of Nausea and/or vomiting DEX/Control | Scale used for assessing PONV                                                                                         |
|-------------|------|-------------|-------------|--------------------|-------------|---------------------------------------------|-------------------------------------------------------------------|------------------------|-----------------------------------------------|-----------------------------------------------------------------------------------------------------------------------|
|             |      | DEX         | Control     |                    |             |                                             |                                                                   |                        |                                               |                                                                                                                       |
| Bakri [11]  | 2015 | 31.1±2.4    | 32.3±2.1    | 15/71              | 43/43       | Laparoscopic cholecystectomy                | 1µg/kg DEX IV                                                     | 8 mg DEXa IV           | 9/12                                          | A visual analogue scale (VAS) of 0–100 mm, 0 score meant no nausea, while 100 score meant the worst imaginable nausea |
| Peng [12]   | 2015 | 42.3±10.8   | 43.5±11.1   | 33/43              | 38/38       | Craniotomy                                  | Continuous infusion of DEX 0.5µg/kg/h IV                          | Equal volume of saline | 16/28                                         | 0, absent; 1, nausea not requiring treatment; 2, nausea requiring treatment; and 3, vomiting.                         |
| Chen [13]   | 2016 | 56.67±2.705 | 60.17±1.644 | 29/31              | 30/30       | Laparoscopic resection of colorectal cancer | Loading dose 1µg /kg DEX, continuous infusion of 0.3µg /kg/h IV   | Equal volume of saline | 6/6                                           | Verbal rating scale scores: 0: no, 1–3: mild, 4–6: moderate, 7–10: severe                                             |
| Bielka [14] | 2018 | 55 (49–61)  | 53 (49–66)  | 7/53               | 30/30       | Laparoscopic cholecystectomy                | Continuous infusion of DEX 0.5µg/kg/h IV                          | Equal volume of saline | 2/8                                           | NR                                                                                                                    |
| Das[15]     | 2018 | 50.74±9.05  | 47.92±8.08  | NR                 | 50/50       | Breast cancer surgery                       | Continuous infusion of DEX 0.6µg/kg/h IV                          | Equal volume of saline | 2/8                                           | NR                                                                                                                    |
| Wu[16]      | 2019 | 67          | 69          | NR                 | NR          | Laparoscopic radical prostatectomy          | Loading dose 1µg /kg DEX, continuous infusion of 0.5µg /kg/h IV   | Equal volume of saline | 2/10                                          | NR                                                                                                                    |
| Bala [17]   | 2019 | 37.2±11.0   | 41±13.4     | 33/27              | 30/30       | Transsphenoidal Pituitary Surgery           | Loading dose 1µg /kg DEX, continuous infusion of 0.5µg /kg/h IV   | Equal volume of saline | 2/6                                           | NR                                                                                                                    |
| Wu[18]      | 2019 | 55.00±5.07  | 54.85±4.96  | 25/15              | 20/20       | Cholangiojejunostomy or resection of tumor  | Loading dose 0.5µg /kg DEX, continuous infusion of 0.5µg /kg/h IV | Equal volume of saline | 1/3                                           | NR                                                                                                                    |
| Bakshi [19] | 2020 | 51.8±12     | 47.2±13     | 14/26              | 19/21       | Robotic-assisted laparoscopic oncologies    | Loading dose 1µg /kg DEX, continuous infusion of 0.2µg /kg/h IV   | Equal volume of saline | 4/3                                           | NR                                                                                                                    |
| Chen [20]   | 2020 | 42.68±7.59  | 43.35±6.82  | 41/36              | 39/38       | Radical resection of gastric cancer         | Loading dose 0.6µg /kg DEX, continuous infusion of 0.4µg /kg/h IV | Equal volume of saline | 1/3                                           | NR                                                                                                                    |
| Asri [21]   | 2020 | 51±12       | 46±16       | 32/10              | 21/21       | Thoracic Surgery                            | Continuous infusion of DEX 0.3µg/kg/h IV                          | Equal volume of saline | 0/5                                           | NR                                                                                                                    |

Table 1: Characteristics of the included trials.

| Author          | Year | Age (yr)      |               | Gender male/female | Number  | Type of surgery                                | Administration mode                                             | Comparisons                                                       | Numbers of PONV DEX/Control DEX/Control | Scale used for assessing PONV                         |
|-----------------|------|---------------|---------------|--------------------|---------|------------------------------------------------|-----------------------------------------------------------------|-------------------------------------------------------------------|-----------------------------------------|-------------------------------------------------------|
|                 |      | DEX           | Control       |                    |         |                                                |                                                                 |                                                                   |                                         |                                                       |
| Pi[22]          | 2021 | 42.15±1.34    | 41.88±1.56    | 162/55             | 121/96  | Thoracoscopic radical resection of lung cancer | Loading dose 0.4µg/kg DEX, continuous infusion of 0.2µg/kg/h IV | Equal volume of saline                                            | 0/1                                     | NR                                                    |
| Lu[23]          | 2021 | 70.1 ±5.8     | 70.4 ±6.5     | 445/230            | 344/331 | Abdominal Surgery                              | Loading dose 0.5µg/kg DEX, continuous infusion of 0.2µg/kg/h IV | Equal volume of saline                                            | 16/17                                   | 10-point rating scale 0: no PONV and 10: maximal PONV |
| Bafna[24]       | 2021 | 27.23±7.75    | 27.49±8.68    | 38/32              | 35/35   | Endoscopic sinus surgery                       | Loading dose 1µg/kg DEX, continuous infusion of 1µg/kg/h IV     | Loading dose 2µg/kg clonidine, continuous infusion of 1µg/kg/h IV | 4/1                                     | NR                                                    |
| Prashantha [25] | 2021 | 37.73 ± 7.24  | 35.63 ± 12.61 | 19/61              | 40/40   | Laparoscopic cholecystectomy                   | DEX IV                                                          | Saline IV                                                         | 5/14                                    | NR                                                    |
| Chen[26]        | 2021 | 55.93 ± 11.14 | 55.64 ± 10.81 | 41/35              | 38/38   | Thoracoscopic pulmonary segmentectomy          | 0.6µg/kg DEX infusion from 10 min before induction              | Equal volume of saline                                            | 1/1                                     | NR                                                    |
| Yan[7]          | 2021 | 73.2 ± 5.8    | 72.7 ± 4.3    | 42/58              | 50/50   | Total Hip Arthroplasty                         | Continuous infusion of DEX 0.3µg/kg/h IV                        | Equal volume of saline                                            | 5/4                                     | NR                                                    |
| Chen[27]        | 2021 | 50.76 ± 8.32  | 51.07 ± 9.43  | 44/36              | 40/40   | Intestinal Surgery                             | Loading dose 1µg/kg DEX, continuous infusion of 0.4µg/kg/h IV   | Equal volume of saline                                            | 1/6                                     | NR                                                    |

Abbreviations: DEX: dexmedetomidine; Dexa: dexamethasone; NR: not reported.

1  
2  
3  
4 1  
5  
67 **2 The association between DEX and PONV**

8  
9 3 All 18 trials involved the effect of DEX on the incidence of PONV. There was no heterogeneity  
10  
11 4 between the articles ( $P < 0.00001$ ,  $I^2 = 26\%$ , Fig. 3), so a fixed-effects model was chosen. The  
12  
13 5 consequences revealed that the occurrence of PONV in DEX group was lower than the control group  
14  
15 6 (OR=0.49, 95% CI 0.36 to 0.67, Fig. 3), which indicated that DEX notably prevent the happening  
16  
17 7 of PONV in adult patients after general anesthetic surgery.  
18  
19

20  
21  
22 **8 The association between DEX and perioperative opioid consumption**

23  
24  
25 9 8 studies assessed the effect of DEX on perioperative opioid consumption. Because of a high  
26  
27 10 heterogeneity ( $P < 0.00001$ ,  $I^2 = 91\%$ , Fig. 4), a random effect model was selected. The consequences  
28  
29 11 of this meta-analysis indicated that the perioperative opioid consumption was lower in DEX group  
30  
31 12 (SMD= -1.04, 95% CI -1.53 to -0.54, Fig. 4). Our results suggested that DEX decreased the  
32  
33 13 perioperative opioid consumption significantly.  
34  
35

36  
37  
38 **14 Other recovery outcomes**

39  
40 15 4 literatures including 200 patients involved the length of hospitalization. The study  
41  
42 16 heterogeneity was high ( $P < 0.00001$ ,  $I^2 = 96\%$ , Fig. 5), so a random effect model was selected. The  
43  
44 17 consequence found that the length of hospitalization in DEX group was shorter (SMD= -2.29, 95%  
45  
46 18 CI -4.31 to -0.28, Fig. 5). 4 trials including 292 subjects referred to the extubation time. A random  
47  
48 19 effect model was chosen since the high heterogeneity ( $P = 0.004$ ,  $I^2 = 77\%$ , Fig. 6). There was a shorter  
49  
50 20 time to extubation in DEX group (SMD= -0.75, 95% CI -1.26 to -0.25, Fig. 6). Therefore, meta-  
51  
52 21 analysis of the 8 literatures indicated that DEX could accelerate the recovery of patients after  
53  
54 22 anesthesia.  
55  
56  
57  
58  
59  
60

## 1 Side effects

2 8 trials described the incidence of bradycardia. A fixed effect model was selected considering  
3 the little heterogeneity ( $P=0.32$ ,  $I^2=14\%$ , Fig. 7). Compared to the control group, the number of  
4 participants developed bradycardia in the DEX group was higher (OR=1.60, 95% CI 1.13 to 2.27,  
5 Fig. 7). The consequences from this meta-analysis revealed that DEX might increase the occurrence  
6 of bradycardia.

## 7 Risk of bias

8 Publication bias of literatures including the incidence of PONV in our meta-analysis was  
9 assessed by funnel plots, and no publication bias was found (Fig. 8). We removed each study one  
10 by one for sensitivity analysis and found that the results did not change (Supplementary document  
11 3).

## 12 DISCUSSION

13 This present meta-analysis showed that DEX is a potential effective agent for decreasing the  
14 incidence of PONV and promoting the recovery of adult patients undergoing general anesthetic  
15 surgery, but it might increase the incidence of bradycardia.

16 PONV is unsatisfactory experience and painful adverse event for patients, especially in the  
17 first day after surgery. Its incidence is approximately 30% and up to 80% without prevention[1; 28].  
18 Moreover, some surgical types were associated with the high occurrence of PONV, especially in  
19 gynecological surgery, otolaryngology surgery and neurosurgery[3]. There are many risk factors  
20 that can increase the incidence of PONV by 20% respectively in patients, including anesthetic  
21 factors, surgical factors, female, non-smokers, and the medical history of motion sickness or/and  
22 PONV[29]. These risk factors might also vary with the premedication, anesthetic technique and



1  
2  
3  
4 1 postoperative management[30]. Among the factors of anesthesia, general anesthesia is more likely  
5  
6 2 to cause PONV compared with regional anesthesia[31]. The pathophysiology process of PONV is  
7  
8  
9 3 very elusive. A study suggested that injuries from operation, anesthesia, visceral nerve stimulation,  
10  
11 4 hypoxia, hypotension, and pain were the major irritants, which could trigger the vomiting response  
12  
13  
14 5 when they reach the cortical/thalamic, cerebellar and vestibular nuclei, and the chemoreceptor  
15  
16  
17 6 triggering band outside of the blood-brain barrier[32]. Although there are multiple methods and  
18  
19  
20 7 drugs to prevent PONV in clinical practice, the efficacy of PONV prophylaxis remains  
21  
22 8 unsatisfactory especially in high-risk patients[1].

23  
24  
25 9 DEX exerts the anxiolytic, sedative and analgesic effects by reducing the release of  
26  
27  
28 10 norepinephrine induced by  $\alpha 2$  adrenergic receptors in the spinal cord and locus coeruleus. However,  
29  
30  
31 11 it could not result in excessive sedation or respiratory depression as the results of accumulation[33].  
32  
33  
34 12 Therefore, DEX was used as an appropriate short-acting sedative for patients under general  
35  
36  
37 13 anesthesia in perioperative period. Previous articles indicated that DEX reduced the occurrence of  
38  
39  
40 14 PONV, which were similar to our result. For instance, a study reported that DEX administered could  
41  
42  
43 15 decrease the occurrence of PONV in patients experiencing intestinal surgery[27], another study  
44  
45  
46 16 discovered that intraoperative use of DEX could be a valid measure to prevent the PONV in patients  
47  
48  
49 17 after laparoscopic radical prostatectomy[16]. But the mechanisms for the effect of DEX on PONV  
50  
51  
52 18 are still obscure. Previous articles reported DEX could decrease the occurrence of PONV by  
53  
54  
55 19 modulating 5-HT and dopamine release, suppressing the histamine-induced expression of IL-6, and  
56  
57  
58 20 reducing sympathetic outflow and total catecholamine release[34; 35]. So, one of the key  
59  
60 21 mechanisms about the effect of DEX on PONV might be attributable to the regulation of  
22 22 neurotransmitters. Moreover, it is well known to us that the amount of intraoperative opioid use

1 directly influenced the frequency and degree of PONV[31].

2 DEX also can prevent the perioperative stress response by regulating heart rate and blood  
3 pressure, however, DEX might produce some adverse events like bradycardia especially in patient  
4 with atrioventricular block or hypovolemia[36]. Similar consequence with our article, a meta-  
5 analysis of 3638 patients from 9 high-quality RCTs reported that DEX could increase the incidence  
6 of bradycardia[37], which might be due to presynaptic  $\alpha$ -2 receptor stimulation by DEX results in  
7 decreasing norepinephrine release.

8 Additionally, it was interesting to found that DEX could short the time to extubation in this  
9 meta-analysis, which was similar to the result of one previous meta-analysis[38]. However, because  
10 of the limited data and the high heterogeneity among the studies, the pooled result should be  
11 interpreted cautiously and further investigations were needed to support the conclusion.

12 In fact, there were two previous meta-analyses also reported that DEX could low the  
13 occurrence of PONV compared to the control group[30; 39]. The included population of these two  
14 meta-analyses was the children and adults, and one study didn't limit the methods of anesthesia and  
15 the administration of DEX. Notably, we mainly focused on the adult patient population under  
16 general anesthesia, and the intervention was perioperative intravenous DEX, which differed from  
17 the two previous meta-analyses. Moreover, the RCTs that DEX comparing with opioids agents were  
18 excluded in our meta-analysis to eliminate the effect of opioids on PONV. Additionally, our study  
19 was involved a number of updated RCTs and added some indicators about the recovery after surgery.  
20 Ultimately, our results suggested that DEX did decrease the occurrence of PONV, and accelerated  
21 the recovery of adult patients after general anesthesia.

## 22 **Clinical significance**

1  
2  
3  
4 1 The results of this meta-analysis might help the doctors and nurses to formulate plans to prevent  
5  
6 2 PONV and offer a new testimony to expand the clinical significance of DEX apart from its  
7  
8  
9 3 conventional usage for sedation and analgesia.

#### 10 4 **LIMITATIONS**

11  
12  
13  
14 5 There were several limitations to this meta-analysis. Firstly, the included articles did not give  
15  
16 6 consistent doses of DEX, the influence of diverse doses of DEX on PONV in adult patients after  
17  
18  
19 7 general anesthesia needs to be further explored. Secondly, the severity degree of PONV was not  
20  
21  
22 8 quantified using a formal scale, so further study is required to explore the effect of DEX on different  
23  
24  
25 9 severity degree of PONV.

#### 26 27 10 **CONCLUSION**

28  
29  
30 11 In a word, DEX could decrease the occurrence of PONV in adult patients who experiencing  
31  
32 12 general anesthesia, and accelerate postoperative recovery. Thus, DEX can be used as an adjuvant  
33  
34  
35 13 drug for general anesthesia to prevent the development of PONV in clinical practice. However, it is  
36  
37  
38 14 essential to be vigilant the occurrence of bradycardia during surgery.

39  
40 15 **Author Contributions** WZ and JL were involved in the conception and design of this meta-analysis. NW and ZW  
41  
42 16 conducted the data extraction. HZ and ML contributed to statistical analysis. WZ analyzed the data and drafted the  
43  
44  
45 17 manuscript. JH, DY and MZ offered major comments and revised the manuscript. All authors have read and  
46  
47  
48 18 approved the manuscript.

49  
50 19 **Funding** The work was supported by the Key Research and Development Program of Hebei Province (Grant No.  
51  
52 20 19277714D). The funding bodies had no role in the design of the study, and will have no role in the data collection,  
53  
54  
55 21 analysis, interpretation of data, and writing of the manuscript.

- 1  
2  
3  
4 1 **Ethics approval statement** This study was a meta-analysis of previously published literatures, ethical approval  
5  
6 2 was not necessary.  
7  
8  
9 3 **Competing interests** None declared.  
10  
11 4 **Patient and public involvement** Patients and/or the public were not involved in the design, or conduct, or reporting,  
12  
13 5 or dissemination plans of this research.  
14  
15 6 **Patient consent for publication** Not applicable.  
16  
17 7 **Provenance and peer review** Not commissioned; externally peer reviewed.  
18  
19 8 **Data availability statement** All data relevant to the study are included in the article or uploaded as supplementary  
20  
21 9 information.  
22  
23 10 **Supplemental material** This content has been supplied by the author(s). It has not been vetted by BMJ Publishing  
24  
25 11 Group Limited (BMJ) and may not have been peer-reviewed. Any opinions or recommendations discussed are solely  
26  
27 12 those of the author(s) and are not endorsed by BMJ. BMJ disclaims all liability and responsibility arising from any  
28  
29 13 reliance placed on the content. Where the content includes any translated material, BMJ does not warrant the  
30  
31 14 accuracy and reliability of the translations (including but not limited to local regulations, clinical guidelines,  
32  
33 15 terminology, drug names and drug dosages), and is not responsible for any error and/or omissions arising from  
34  
35 16 translation and adaptation or otherwise.  
36  
37 17 **Open access** This is an open access article distributed in accordance with the Creative Commons Attribution Non  
38  
39 18 Commercial (CC BY-NC 4.0) license, which permits others to distribute, remix, adapt, build upon this work non-  
40  
41 19 commercially, and license their derivative works on different terms, provided the original work is properly cited,  
42  
43 20 appropriate credit is given, any changes made indicated, and the use is non-commercial.  
44  
45 21 See: <http://creativecommons.org/licenses/by-nc/4.0/>.  
46  
47 22 **ORCID** Jianli Li: <https://orcid.org/0000-0001-6867-7825>  
48  
49  
50  
51  
52  
53  
54  
55  
56  
57  
58  
59  
60

## 1 REFERENCES

- 1 1. Gan TJ, Belani KG, Bergese S, et al. 2020. Fourth Consensus Guidelines for the  
2 Management of Postoperative Nausea and Vomiting. *Anesth Analg* 131:411-48.  
3 <https://doi.org/10.1213/ane.0000000000004833>
- 4 2. Ishikawa E, Iwamoto R, Hojo T, et al. 2022. Cross-sectional Study of PONV Risk  
5 Factors for Oral Surgery After Intubated General Anesthesia With Total Intravenous  
6 Anesthesia. *Anesth Prog* 69:18-23. <https://doi.org/10.2344/anpr-68-03-12>
- 7 3. Elvir-Lazo OL, White PF, Yumul R, et al. 2020. Management strategies for the  
8 treatment and prevention of postoperative/postdischarge nausea and vomiting: an  
9 updated review. *F1000Res* 9. <https://doi.org/10.12688/f1000research.21832.1>
- 10 4. Li HJ, Liu S, Geng ZY, et al. 2020. Adding dexmedetomidine to morphine-based  
11 analgesia reduces early postoperative nausea in patients undergoing gynecological  
12 laparoscopic surgery: a randomized controlled trial. *BMC Anesthesiol* 20:11.  
13 <https://doi.org/10.1186/s12871-019-0928-y>
- 14 5. Lee J, Hwang HW, Jeong JY, et al. 2022. The Effect of Low-Dose Dexmedetomidine  
15 on Pain and Inflammation in Patients Undergoing Laparoscopic Hysterectomy. *J Clin*  
16 *Med* 11. <https://doi.org/10.3390/jcm11102802>
- 17 6. Xie C, Zhang C, Sun H, et al. 2021. Effects of Dexmedetomidine on Postoperative  
18 Nausea and Vomiting in Adult Patients Undergoing Ambulatory Thyroidectomy: A  
19 Randomized Clinical Trial. *Front Med (Lausanne)* 8:781689.  
20 <https://doi.org/10.3389/fmed.2021.781689>
- 21 7. Yan C, Ti-jun D. 2021. Effects of Intraoperative Dexmedetomidine Infusion on  
22

- 1  
2  
3  
4 1 Postoperative Delirium in Elderly Patients Undergoing Total Hip Arthroplasty.  
5  
6 2 *International Surgery* 105:328-35. <https://doi.org/10.9738/int surg-d-17-00029.1>  
7  
8  
9 3 8. Page MJ, McKenzie JE, Bossuyt PM, et al. 2021. The PRISMA 2020 statement: an  
10 updated guideline for reporting systematic reviews. *Syst Rev* 10:89.  
11  
12 4  
13  
14 5 <https://doi.org/10.1186/s13643-021-01626-4>  
15  
16  
17 6 9. van Loveren C, Aartman IH. 2007. [The PICO (Patient-Intervention-Comparison-  
18 Outcome) question]. *Ned Tijdschr Tandheelkd* 114:172-8.  
19  
20 7  
21  
22 8 10. Higgins JP, Altman DG, Gøtzsche PC, et al. 2011. The Cochrane Collaboration's tool  
23 for assessing risk of bias in randomised trials. *Bmj* 343:d5928.  
24  
25 9  
26  
27 10 <https://doi.org/10.1136/bmj.d5928>  
28  
29  
30 11 11. Bakri MH, Ismail EA, Ibrahim A. 2015. Comparison of dexmedetomidine and  
31 dexamethasone for prevention of postoperative nausea and vomiting after laparoscopic  
32 cholecystectomy. *Korean J Anesthesiol* 68:254-60.  
33  
34 12  
35 13 <https://doi.org/10.4097/kjae.2015.68.3.254>  
36  
37  
38 14  
39  
40 15 12. Peng K, Jin XH, Liu SL, et al. 2015. Effect of Intraoperative Dexmedetomidine on Post-  
41 Craniotomy Pain. *Clin Ther* 37:1114-21 e1.  
42  
43 16  
44  
45 17 <https://doi.org/10.1016/j.clinthera.2015.02.011>  
46  
47  
48 18 13. Chen C, Huang P, Lai L, et al. 2016. Dexmedetomidine improves gastrointestinal  
49 motility after laparoscopic resection of colorectal cancer: A randomized clinical trial.  
50  
51 19  
52 20 *Medicine (Baltimore)* 95:e4295. <https://doi.org/10.1097/MD.0000000000004295>  
53  
54  
55 21 14. Bielka K, Kuchyn I, Babych V, et al. 2018. Dexmedetomidine infusion as an analgesic  
56 adjuvant during laparoscopic small es, Cyrillicholecystectomy: a randomized controlled  
57  
58 22  
59  
60

- 1  
2  
3  
4 1 study. *BMC Anesthesiol* 18:44. <https://doi.org/10.1186/s12871-018-0508-6>  
5  
6 2 15. Das R, Das RK, Sahoo S, et al. 2018. Role of dexmedetomidine as an anaesthetic  
7  
8  
9 3  
10  
11 4  
12 4 study. *Indian J Anaesth* 62:182-7. [https://doi.org/10.4103/ija.IJA\\_752\\_17](https://doi.org/10.4103/ija.IJA_752_17)  
13  
14 5 16. Wu S, Yao H, Cheng N, et al. 2019. Determining whether dexmedetomidine provides  
15  
16  
17 6  
18 a reno-protective effect in patients receiving laparoscopic radical prostatectomy: a pilot  
19  
20 7  
21 study. *Int Urol Nephrol* 51:1553-61. <https://doi.org/10.1007/s11255-019-02171-9>  
22  
23 8 17. Bala R, Chaturvedi A, Pandia MP, et al. 2019. Intraoperative Dexmedetomidine  
24  
25 9  
26 Maintains Hemodynamic Stability and Hastens Postoperative Recovery in Patients  
27  
28 10  
29 Undergoing Transsphenoidal Pituitary Surgery. *J Neurosci Rural Pract* 10:599-605.  
30  
31 11  
32 <https://doi.org/10.1055/s-0039-3399402>  
33  
34 12 18. Wu F, Duan H, Xie Y. 2019. Preventive Effects of Dexmedetomidine on Renal  
35  
36 13  
37 Dysfunction and Hemodynamic Stability in Malignant Obstructive Jaundice Patients  
38  
39 14  
40 During Peri-Operative Period. *Med Sci Monit* 25:6782-7.  
41  
42 15  
43 <https://doi.org/10.12659/MSM.916329>  
44  
45 16 19. Bakshi SG, Paulin SV, Bhawalkar P. 2020. A randomised controlled trial to evaluate  
46  
47 17  
48 the peri-operative role of intraoperative dexmedetomidine infusion in robotic-assisted  
49  
50 18  
51 laparoscopic oncosurgeries. *Indian J Anaesth* 64:784-9.  
52  
53 19  
54 [https://doi.org/10.4103/ija.IJA\\_664\\_20](https://doi.org/10.4103/ija.IJA_664_20)  
55  
56 20 20. Chen. X, Chen X. 2020. Dexmedetomidine contributes to reduced anesthesia dosages  
57  
58 21  
59 and improves anesthetic effectiveness in the radical resection of gastric cancer. *Int J*  
60  
61 *Clin Exp Med* 13:6533-41.

- 1  
2  
3  
4 1 21. Asri S, Hosseinzadeh H, Eydi M, et al. 2020. Effect of Dexmedetomidine Combined  
5  
6 with Inhalation of Isoflurane on Oxygenation Following One-Lung Ventilation in  
7  
8 Thoracic Surgery. *Anesth Pain Med* 10:e95287. <https://doi.org/10.5812/aapm.95287>  
9  
10  
11 4 22. Pi. Y, Yang Y. 2021. Application value of conventional anesthesia combined with  
12  
13 dexmedetomidine in thoracoscopic radical resection of lung cancer. *Int J Clin Exp Med*  
14  
15 14:1301-8.  
16  
17  
18 7 23. Lu Y, Fang PP, Yu YQ, et al. 2021. Effect of Intraoperative Dexmedetomidine on  
19  
20 Recovery of Gastrointestinal Function After Abdominal Surgery in Older Adults: A  
21  
22 Randomized Clinical Trial. *JAMA Netw Open* 4:e2128886.  
23  
24  
25  
26  
27 <https://doi.org/10.1001/jamanetworkopen.2021.28886>  
28  
29  
30 11 24. Bafna U, Sharma P, Singhal RK, et al. 2021. Comparison of hypotensive properties of  
31  
32 dexmedetomidine versus clonidine for induced hypotension during functional  
33  
34 endoscopic sinus surgery: A randomised, double-blind interventional study. *Indian J*  
35  
36  
37  
38 *Anaesth* 65:579-85. [https://doi.org/10.4103/ija.IJA\\_57\\_21](https://doi.org/10.4103/ija.IJA_57_21)  
39  
40  
41 15 25. Dr. Radhika Agarwala DPKH, Dr. Usha Saha,. 2021. Dexmedetomidine Infusion in  
42  
43 Patients Undergoing Elective Laparoscopic Cholecystectomy under General  
44  
45 Anesthesia: Postoperative Analgesia and Complications. *European Journal of*  
46  
47  
48  
49 *Molecular & Clinical Medicine* 8:1906-11.  
50  
51 19 26. Chen. J, Chen. B, Chen. A. 2021. Effects of anesthesia induction using  
52  
53 dexmedetomidine in thoracoscopic pulmonary segmentectomy on the safety and  
54  
55 protection of lung function. *Int J Clin Exp Med* 14:565-72.  
56  
57  
58 22 27. Chen R, Kang Z, Wang Y, et al. 2021. The Anti-inflammatory Effect of  
59  
60



- 1  
2  
3  
4 1 Dexmedetomidine Administration on Patients Undergoing Intestinal Surgery: A  
5  
6 2 Randomized Study. *Drugs R D* 21:445-53. <https://doi.org/10.1007/s40268-021-00368->  
7  
8  
9 3 x  
10  
11  
12 4 28. Gloor Y, Czarnetzki C, Curtin F, et al. 2021. Genetic Susceptibility Toward Nausea and  
13  
14 5 Vomiting in Surgical Patients. *Front Genet* 12:816908.  
15  
16 6 <https://doi.org/10.3389/fgene.2021.816908>  
17  
18  
19 7 29. Lu H, Zheng C, Liang B, et al. 2021. Mechanism and risk factors of nausea and vomiting  
20  
21 8 after TACE: a retrospective analysis. *BMC Cancer* 21:513.  
22  
23 9 <https://doi.org/10.1186/s12885-021-08253-1>  
24  
25  
26  
27 10 30. Liang X, Zhou M, Feng JJ, et al. 2015. Efficacy of dexmedetomidine on postoperative  
28  
29 11 nausea and vomiting: a meta-analysis of randomized controlled trials. *Int J Clin Exp*  
30  
31 12 *Med* 8:8450-71.  
32  
33  
34  
35 13 31. Poon YY, Ke TY, Hung KC, et al. 2021. Risk Factors of Postoperative Vomiting in the  
36  
37 14 Eye of "Real-World Evidence"-Modifiable and Clinical Setting-Dependent Risk Factors  
38  
39 15 in Surgical Trauma Patients. *J Pers Med* 11. <https://doi.org/10.3390/jpm11050386>  
40  
41  
42  
43 16 32. Konno D, Sugino S, Shibata TF, et al. 2022. Antiemetic effects of baclofen in a shrew  
44  
45 17 model of postoperative nausea and vomiting: Whole-transcriptome analysis in the  
46  
47 18 nucleus of the solitary tract. *CNS Neurosci Ther* 28:922-31.  
48  
49 19 <https://doi.org/10.1111/cns.13823>  
50  
51  
52  
53 20 33. Zhang J, Yu Y, Miao S, et al. 2019. Effects of peri-operative intravenous administration  
54  
55 21 of dexmedetomidine on emergence agitation after general anesthesia in adults: a meta-  
56  
57 22 analysis of randomized controlled trials. *Drug Des Devel Ther* 13:2853-64.  
58  
59  
60

- 1  
2  
3  
4 1 <https://doi.org/10.2147/DDDT.S207016>  
5  
6  
7 2 34. Xu S, Hu S, Ju X, et al. 2021. Effects of intravenous lidocaine, dexmedetomidine, and  
8  
9 3 their combination on IL-1, IL-6 and TNF- $\alpha$  in patients undergoing laparoscopic  
10  
11 4 hysterectomy: a prospective, randomized controlled trial. *BMC Anesthesiol* 21:3.  
12  
13  
14 5 <https://doi.org/10.1186/s12871-020-01219-z>  
15  
16  
17 6 35. Zhang W, Wang R, Li B, et al. 2022. The Effect of Dexmedetomidine on Postoperative  
18  
19 7 Nausea and Vomiting in Patients Undergoing Thoracic Surgery-A Meta-Analysis of a  
20  
21 8 Randomized Controlled Trial. *Front Surg* 9:863249.  
22  
23  
24 9 <https://doi.org/10.3389/fsurg.2022.863249>  
25  
26  
27 10 36. Misra S, Behera BK, Mitra JK, et al. 2021. Effect of preoperative dexmedetomidine  
28  
29 11 nebulization on the hemodynamic response to laryngoscopy and intubation: a  
30  
31 12 randomized control trial. *Korean J Anesthesiol* 74:150-7.  
32  
33  
34 13 <https://doi.org/10.4097/kja.20153>  
35  
36  
37 14 37. Lin C, Tu H, Jie Z, et al. 2021. Effect of Dexmedetomidine on Delirium in Elderly  
38  
39 15 Surgical Patients: A Meta-analysis of Randomized Controlled Trials. *Ann*  
40  
41 16 *Pharmacother* 55:624-36. <https://doi.org/10.1177/1060028020951954>  
42  
43  
44 17 38. Pan H, Liu C, Ma X, et al. 2019. Perioperative dexmedetomidine reduces delirium in  
45  
46 18 elderly patients after non-cardiac surgery: a systematic review and meta-analysis of  
47  
48 19 randomized-controlled trials. *Can J Anaesth* 66:1489-500.  
49  
50  
51 20 <https://doi.org/10.1007/s12630-019-01440-6>  
52  
53  
54 21 39. Jin S, Liang DD, Chen C, et al. 2017. Dexmedetomidine prevent postoperative nausea  
55  
56 22 and vomiting on patients during general anesthesia: A PRISMA-compliant meta  
57  
58  
59  
60

1  
2  
3  
4 1 analysis of randomized controlled trials. *Medicine (Baltimore)* 96:e5770.

5  
6  
7 2 <https://doi.org/10.1097/md.0000000000005770>

8  
9 3 **Figure legends**

10  
11  
12 4 **Figure 1:** The risk of bias of included studies.

13  
14  
15 5 **Figure 2:** Flow diagram of the inclusion and exclusion process.

16  
17  
18 6 **Figure 3:** The total effect of dexmedetomidine on postoperative nausea and vomiting.

19  
20  
21  
22 7 **Figure 4:** Perioperative opioid consumption in dexmedetomidine and control group.

23  
24  
25 8 **Figure 5:** The effect of dexmedetomidine on the length of hospitalization.

26  
27  
28 9 **Figure 6:** The effect of dexmedetomidine on the extubation time.

29  
30  
31  
32 10 **Figure 7:** Incidence of bradycardia in dexmedetomidine and control group.

33  
34  
35  
36  
37 11 **Figure 8:** Test for publication bias of the studies included in the incidence of postoperative nausea  
38  
39  
40  
41 12 and vomiting.

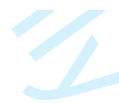

1  
2  
3  
4  
5  
6  
7  
8  
9  
10  
11  
12  
13  
14  
15  
16  
17  
18  
19  
20  
21  
22  
23  
24  
25  
26  
27  
28  
29  
30  
31  
32  
33  
34  
35  
36  
37  
38  
39  
40  
41  
42  
43  
44  
45  
46  
47  
48  
49  
50  
51  
52  
53  
54  
55  
56  
57  
58  
59  
60

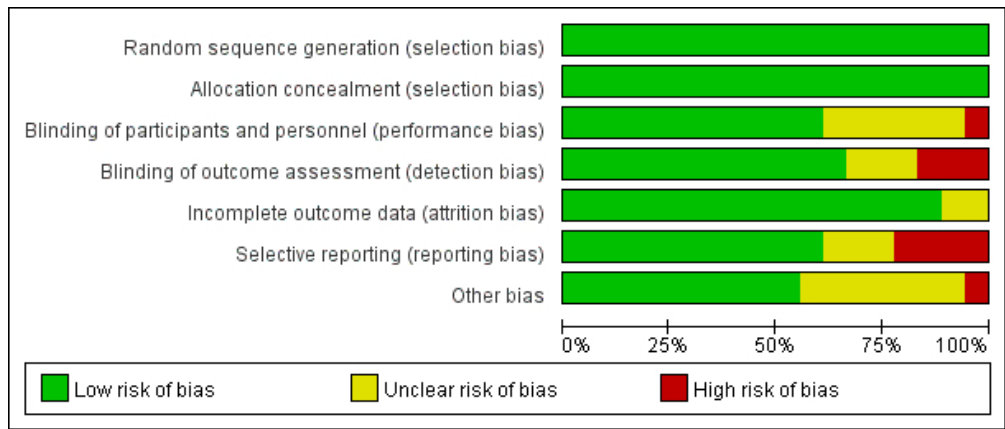

Figure 1: The risk of bias of included studies.

213x90mm (72 x 72 DPI)

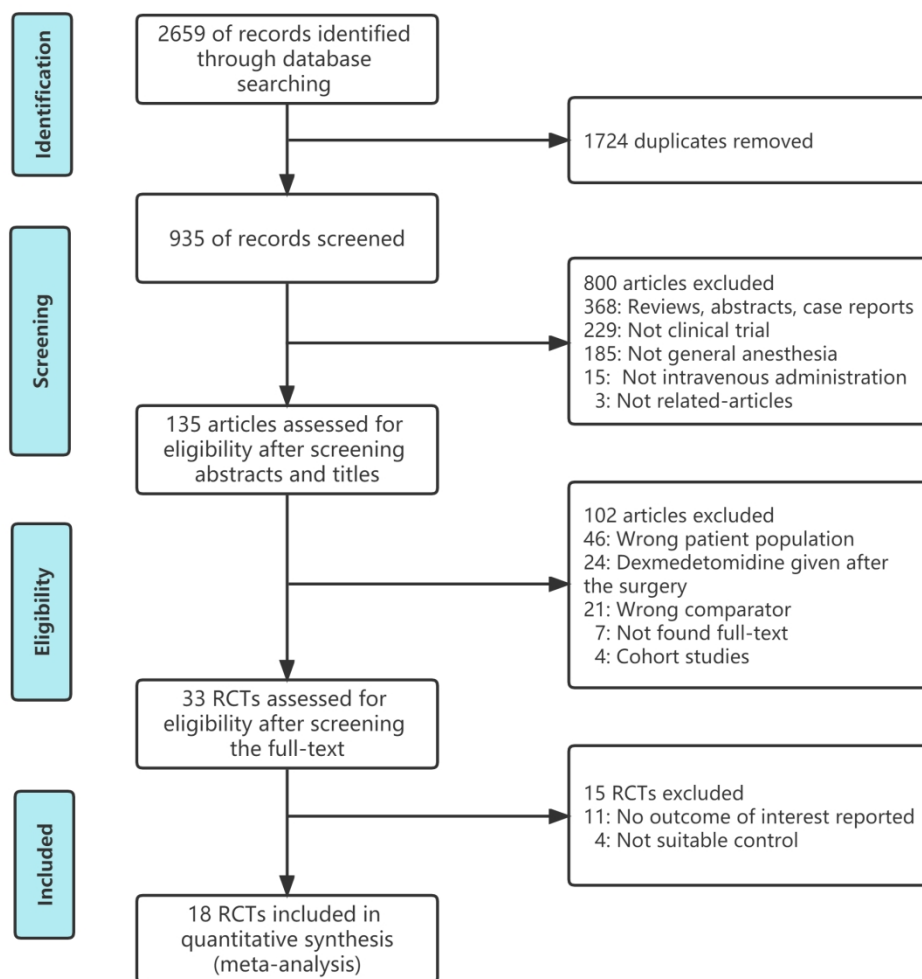

Figure 2: Flow diagram of the inclusion and exclusion process.

720x751mm (72 x 72 DPI)

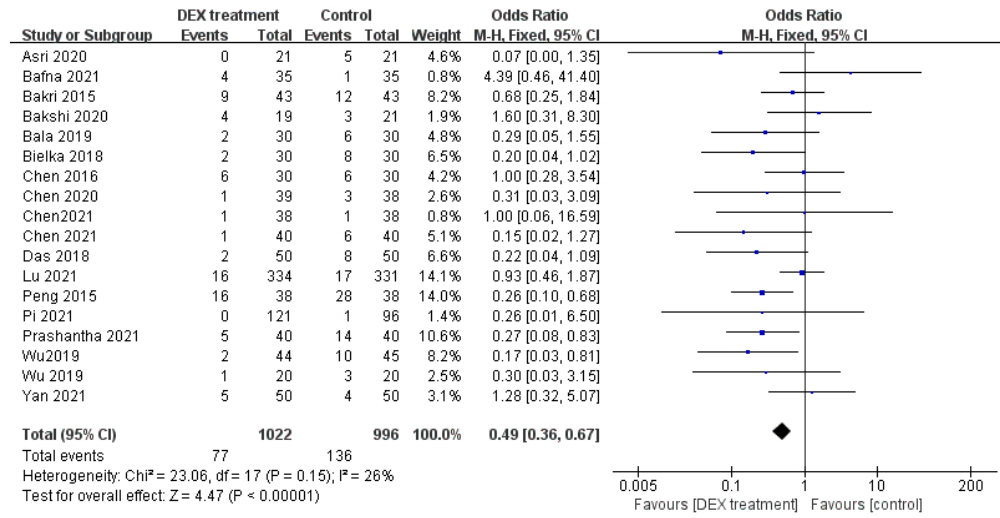

Figure 3: The total effect of dexmedetomidine on postoperative nausea and vomiting.

283x146mm (72 x 72 DPI)

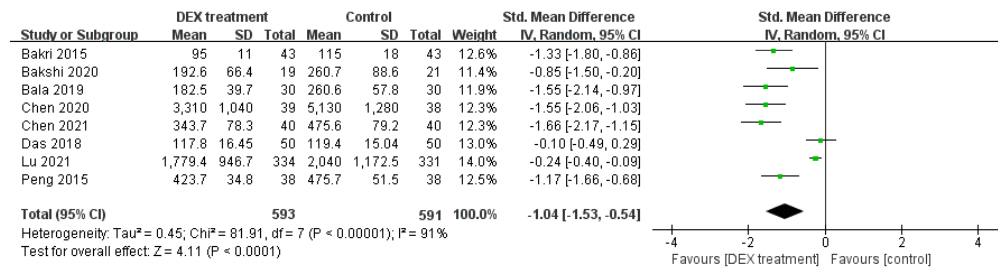

Figure 4: Perioperative opioid consumption in dexmedetomidine and control group.

314x84mm (72 x 72 DPI)

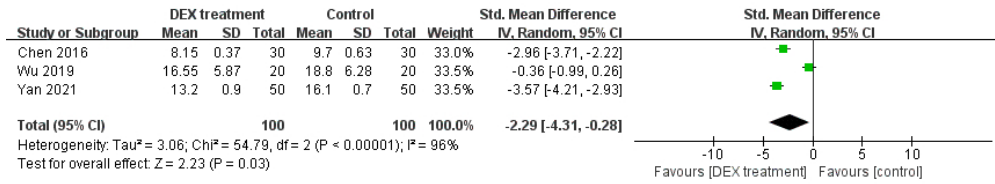

Figure 5: The effect of dexmedetomidine on the length of hospitalization.

303x56mm (72 x 72 DPI)



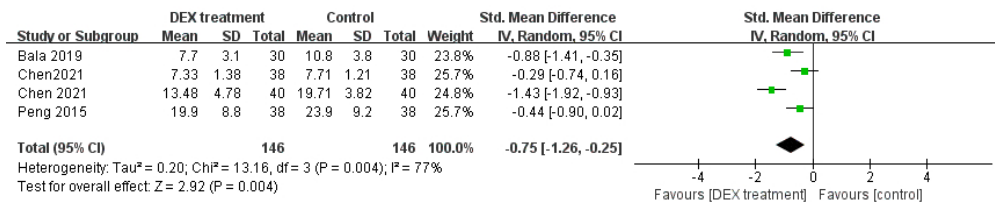

Figure 6: The effect of dexmedetomidine on the extubation time.

303x62mm (72 x 72 DPI)

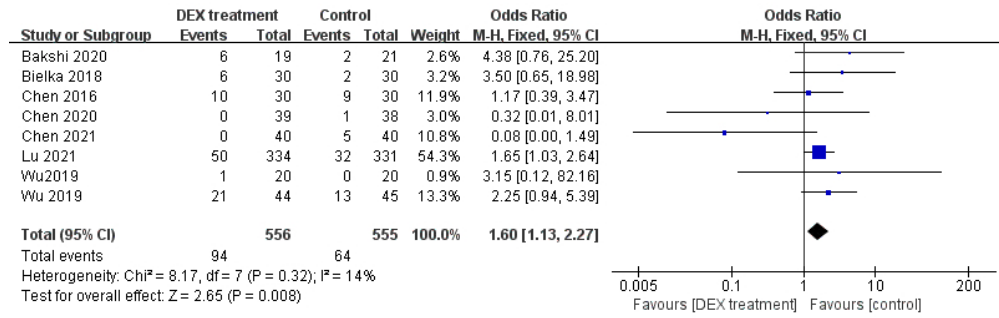

Figure 7: Incidence of bradycardia in dexmedetomidine and control group.

283x90mm (72 x 72 DPI)

1  
2  
3  
4  
5  
6  
7  
8  
9  
10  
11  
12  
13  
14  
15  
16  
17  
18  
19  
20  
21  
22  
23  
24  
25  
26  
27  
28  
29  
30  
31  
32  
33  
34  
35  
36  
37  
38  
39  
40  
41  
42  
43  
44  
45  
46  
47  
48  
49  
50  
51  
52  
53  
54  
55  
56  
57  
58  
59  
60

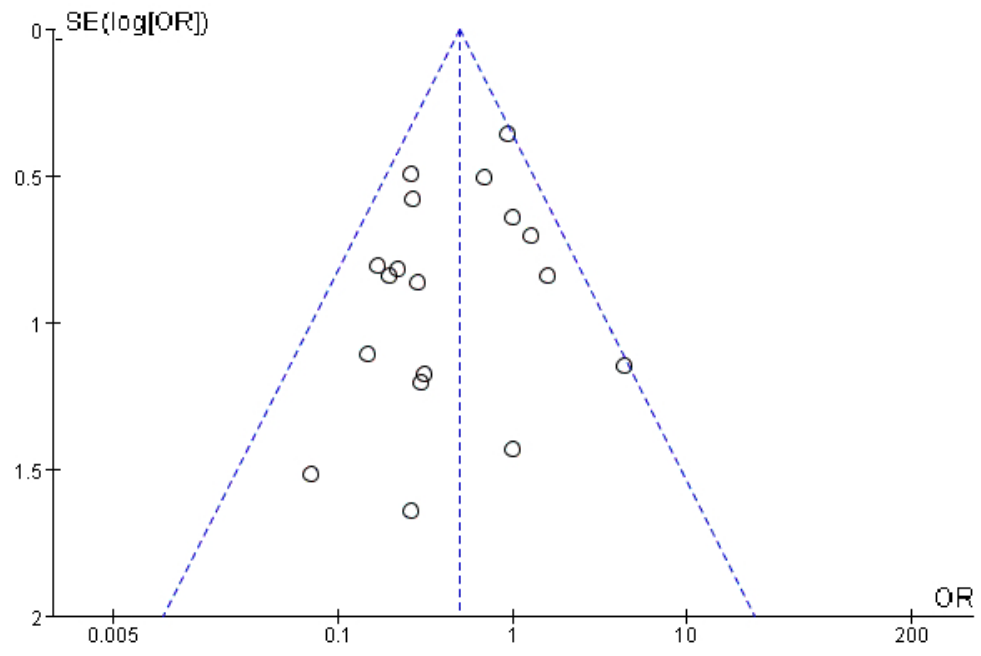

Figure 8: Test for publication bias of the studies included in the incidence of postoperative nausea and vomiting.

544x362mm (28 x 28 DPI)

## Supplementary document 1

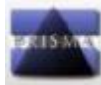

## PRISMA 2020 Checklist

| Section and Topic             | Item # | Checklist item                                                                                                                                                                                                                                                                                       | Location where item is reported    |
|-------------------------------|--------|------------------------------------------------------------------------------------------------------------------------------------------------------------------------------------------------------------------------------------------------------------------------------------------------------|------------------------------------|
| <b>TITLE</b>                  |        |                                                                                                                                                                                                                                                                                                      |                                    |
| Title                         | 1      | Identify the report as a systematic review.                                                                                                                                                                                                                                                          | Page 1                             |
| <b>ABSTRACT</b>               |        |                                                                                                                                                                                                                                                                                                      |                                    |
| Abstract                      | 2      | See the PRISMA 2020 for Abstracts checklist.                                                                                                                                                                                                                                                         | Page 2-3                           |
| <b>INTRODUCTION</b>           |        |                                                                                                                                                                                                                                                                                                      |                                    |
| Rationale                     | 3      | Describe the rationale for the review in the context of existing knowledge.                                                                                                                                                                                                                          | Page 3-4                           |
| Objectives                    | 4      | Provide an explicit statement of the objective(s) or question(s) the review addresses.                                                                                                                                                                                                               | Page 4                             |
| <b>METHODS</b>                |        |                                                                                                                                                                                                                                                                                                      |                                    |
| Eligibility criteria          | 5      | Specify the inclusion and exclusion criteria for the review and how studies were grouped for the syntheses.                                                                                                                                                                                          | Page 5                             |
| Information sources           | 6      | Specify all databases, registers, websites, organisations, reference lists and other sources searched or consulted to identify studies. Specify the date when each source was last searched or consulted.                                                                                            | Page 5<br>Supplementary document 2 |
| Search strategy               | 7      | Present the full search strategies for all databases, registers and websites, including any filters and limits used.                                                                                                                                                                                 | Supplementary document 2           |
| Selection process             | 8      | Specify the methods used to decide whether a study met the inclusion criteria of the review, including how many reviewers screened each record and each report retrieved, whether they worked independently, and if applicable, details of automation tools used in the process.                     | Page 6                             |
| Data collection process       | 9      | Specify the methods used to collect data from reports, including how many reviewers collected data from each report, whether they worked independently, any processes for obtaining or confirming data from study investigators, and if applicable, details of automation tools used in the process. | Page 6                             |
| Data items                    | 10a    | List and define all outcomes for which data were sought. Specify whether all results that were compatible with each outcome domain in each study were sought (eg. for all measures, time points, analyses), and if not, the methods used to decide which results to collect.                         | Page 6                             |
|                               | 10b    | List and define all other variables for which data were sought (e.g. participant and intervention characteristics, funding sources). Describe any assumptions made about any missing or unclear information.                                                                                         | Page 6                             |
| Study risk of bias assessment | 11     | Specify the methods used to assess risk of bias in the included studies, including details of the tool(s) used, how many reviewers assessed each study and whether they worked independently, and if applicable, details of automation tools used in the process.                                    | Page 6                             |
| Effect measures               | 12     | Specify for each outcome the effect measure(s) (e.g. risk ratio, mean difference) used in the synthesis or presentation of results.                                                                                                                                                                  | Page 6                             |
| Synthesis methods             | 13a    | Describe the processes used to decide which studies were eligible for each synthesis (e.g. tabulating the study intervention characteristics and comparing against the planned groups for each synthesis (item #5)).                                                                                 | Table 1                            |
|                               | 13b    | Describe any methods required to prepare the data for presentation or synthesis, such as handling of missing summary statistics, or data                                                                                                                                                             | Page 6                             |

| Section and Topic             | Item # | Checklist item                                                                                                                                                                                                                                                                       | Location where item is reported |
|-------------------------------|--------|--------------------------------------------------------------------------------------------------------------------------------------------------------------------------------------------------------------------------------------------------------------------------------------|---------------------------------|
|                               |        | conversions.                                                                                                                                                                                                                                                                         |                                 |
|                               | 13c    | Describe any methods used to tabulate or visually display results of individual studies and syntheses.                                                                                                                                                                               | Page 6                          |
|                               | 13d    | Describe any methods used to synthesize results and provide a rationale for the choice(s). If meta-analysis was performed, describe the model(s), method(s) to identify the presence and extent of statistical heterogeneity, and software package(s) used.                          | Page 6                          |
|                               | 13e    | Describe any methods used to explore possible causes of heterogeneity among study results (e.g. subgroup analysis, meta-regression).                                                                                                                                                 | Page 6                          |
|                               | 13f    | Describe any sensitivity analyses conducted to assess robustness of the synthesized results.                                                                                                                                                                                         | Page 6                          |
| Reporting bias assessment     | 14     | Describe any methods used to assess risk of bias due to missing results in a synthesis (arising from reporting biases).                                                                                                                                                              | Page 6                          |
| Certainty assessment          | 15     | Describe any methods used to assess certainty (or confidence) in the body of evidence for an outcome.                                                                                                                                                                                | NA                              |
| <b>RESULTS</b>                |        |                                                                                                                                                                                                                                                                                      |                                 |
| Study selection               | 16a    | Describe the results of the search and selection process, from the number of records identified in the search to the number of studies included in the review, ideally using a flow diagram.                                                                                         | Figure 2                        |
|                               | 16b    | Cite studies that might appear to meet the inclusion criteria, but which were excluded, and explain why they were excluded.                                                                                                                                                          | Figure 2                        |
| Study characteristics         | 17     | Cite each included study and present its characteristics.                                                                                                                                                                                                                            | Page 7                          |
| Risk of bias in studies       | 18     | Present assessments of risk of bias for each included study.                                                                                                                                                                                                                         | Page 11<br>Figure 8             |
| Results of individual studies | 19     | For all outcomes, present, for each study: (a) summary statistics for each group (where appropriate) and (b) an effect estimate and its precision (e.g. confidence/credible interval), ideally using structured tables or plots.                                                     | Page 10-11                      |
| Results of syntheses          | 20a    | For each synthesis, briefly summarise the characteristics and risk of bias among contributing studies.                                                                                                                                                                               | Page 10-11                      |
|                               | 20b    | Present results of all statistical syntheses conducted. If meta-analysis was done, present for each the summary estimate and its precision (e.g. confidence/credible interval) and measures of statistical heterogeneity. If comparing groups, describe the direction of the effect. | Page 10-11                      |
|                               | 20c    | Present results of all investigations of possible causes of heterogeneity among study results.                                                                                                                                                                                       | NA                              |
|                               | 20d    | Present results of all sensitivity analyses conducted to assess the robustness of the synthesized results.                                                                                                                                                                           | Supplementary document 3        |
| Reporting biases              | 21     | Present assessments of risk of bias due to missing results (arising from reporting biases) for each synthesis assessed.                                                                                                                                                              | Page 11                         |
| Certainty of evidence         | 22     | Present assessments of certainty (or confidence) in the body of evidence for each outcome assessed.                                                                                                                                                                                  | NA                              |
| <b>DISCUSSION</b>             |        |                                                                                                                                                                                                                                                                                      |                                 |
| Discussion                    | 23a    | Provide a general interpretation of the results in the context of other evidence.                                                                                                                                                                                                    | Page 11-13                      |
|                               | 23b    | Discuss any limitations of the evidence included in the review.                                                                                                                                                                                                                      | Page 14                         |

| Section and Topic                              | Item # | Checklist item                                                                                                                                                                                                                             | Location where item is reported |
|------------------------------------------------|--------|--------------------------------------------------------------------------------------------------------------------------------------------------------------------------------------------------------------------------------------------|---------------------------------|
|                                                | 23c    | Discuss any limitations of the review processes used.                                                                                                                                                                                      | Page 14                         |
|                                                | 23d    | Discuss implications of the results for practice, policy, and future research.                                                                                                                                                             | Page 13-14                      |
| <b>OTHER INFORMATION</b>                       |        |                                                                                                                                                                                                                                            |                                 |
| Registration and protocol                      | 24a    | Provide registration information for the review, including register name and registration number, or state that the review was not registered.                                                                                             | Page 5                          |
|                                                | 24b    | Indicate where the review protocol can be accessed, or state that a protocol was not prepared.                                                                                                                                             | Page 5                          |
|                                                | 24c    | Describe and explain any amendments to information provided at registration or in the protocol.                                                                                                                                            | NA                              |
| Support                                        | 25     | Describe sources of financial or non-financial support for the review, and the role of the funders or sponsors in the review.                                                                                                              | Page 14                         |
| Competing interests                            | 26     | Declare any competing interests of review authors.                                                                                                                                                                                         | Page 15                         |
| Availability of data, code and other materials | 27     | Report which of the following are publicly available and where they can be found: template data collection forms; data extracted from included studies; data used for all analyses; analytic code; any other materials used in the review. | Page 15                         |

From: Page MJ, McKenzie JE, Bossuyt PM, Boutron I, Hoffmann TC, Mulrow CD, et al. The PRISMA 2020 statement: an updated guideline for reporting systematic reviews. *BMJ* 2021;372:n71. doi: 10.1136/bmj.n71

For more information, visit: <http://www.prisma-statement.org/>

## Supplementary document 2: The search strategy

### Pubmed (<https://pubmed.ncbi.nlm.nih.gov/>)

Search: (((((((Dexmedetomidine[MeSH Terms]) OR (Dexmedetomidine[Title/Abstract])) OR (MPV-1440[Title/Abstract])) OR (MPV 1440[Title/Abstract])) OR (MPV1440[Title/Abstract])) OR (Precedex[Title/Abstract])) OR (Dexmedetomidine Hydrochloride[Title/Abstract])) OR (Hydrochloride, Dexmedetomidine[Title/Abstract]) AND (("Postoperative Nausea and Vomiting"[Mesh]) OR (((((((PONV[Title/Abstract]) OR (Nausea[Title/Abstract]) AND Vomiting, Postoperative[Title/Abstract])) OR (Vomiting, Postoperative[Title/Abstract])) OR (Postoperative Emesis[Title/Abstract])) OR (Postoperative Vomiting[Title/Abstract])) OR (Emesis, Postoperative[Title/Abstract])) OR (Emeses, Postoperative[Title/Abstract])) OR (Postoperative Emeses[Title/Abstract])) OR (Postoperative Nausea[Title/Abstract]) OR (Nausea, Postoperative[Title/Abstract]))) AND (2000:2022[pdat])

### Embase (<http://www.embase.com/>)

- #1 Dexmedetomidine
- #2 'mpv- 1440':ab,ti OR 'mpv 1440':ab,ti OR 'mpv1440':ab,ti OR 'precedex':ab,ti OR 'dexmedetomidine hydrochloride':ab,ti OR 'hydrochloride, dexmedetomidine':ab,ti
- #3 #1 OR #2
- #4 postoperative nausea and vomiting
- #5 'ponv':ab,ti OR 'nausea and vomiting, postoperative':ab,ti OR 'vomiting, postoperative':ab,ti OR 'postoperative emesis':ab,ti OR 'postoperative vomiting':ab,ti OR 'emesis, postoperative':ab,ti OR 'emeses, postoperative':ab,ti OR 'postoperative emeses':ab,ti OR 'postoperative nausea':ab,ti OR 'nausea, postoperative':ab,ti
- #6 #4 OR #5
- #7 [2000-2022]/py
- #8 #3 AND #6 AND #7

### Cochrane (<https://www.cochranelibrary.com/>)

- #1 Dexmedetomidine
- #2 (MPV- 1440):ti,ab,kw OR (MPV 1440):ti,ab,kw OR (MPV1440):ti,ab,kw OR (Precedex):ti,ab,kw OR (Dexmedetomidine Hydrochloride):ti,ab,kw OR (Hydrochloride, Dexmedetomidine):ti,ab,kw
- #3 #1 OR #2
- #4 **Postoperative nausea and vomiting**
- #5 (PONV):ti,ab,kw OR (Nausea and Vomiting, Postoperative):ti,ab,kw OR (Vomiting, Postoperative):ti,ab,kw OR (Postoperative Emesis):ti,ab,kw OR (Postoperative

1  
2  
3 Vomiting):ti,ab,kw OR (Emesis, Postoperative):ti,ab,kw OR (Emeses, Postoperative):ti,ab,kw  
4 OR (Postoperative Emeses):ti,ab,kw OR (Postoperative Nausea):ti,ab,kw OR (Nausea,  
5 Postoperative):ti,ab,kw  
6  
7

- 8 • #6 #4 OR #5
- 9
- 10 • #7 #3 AND #6 (with Publication Year from 2000 to 2022)
- 11
- 12

### 13 **Web of Science (<http://apps.webofknowledge.com/>)**

- 14

- 15 • #1 TS= (Postoperative nausea and vomiting OR PONV OR Nausea and Vomiting,  
16 Postoperative OR Vomiting, Postoperative OR Postoperative Emesis OR Postoperative  
17 Vomiting OR Emesis, Postoperative OR Emeses, Postoperative OR Postoperative Emeses OR  
18 Postoperative Nausea OR Nausea, Postoperative)  
19
- 20 • #2 TS= (Dexmedetomidine OR MPV-1440 OR MPV 1440 OR MPV1440 OR Precedex OR  
21 Dexmedetomidine Hydrochloride OR Hydrochloride, Dexmedetomidine)  
22
- 23 • #3 PY= (2000-2022)
- 24 • #4 #1 and #2 and #3
- 25
- 26
- 27
- 28
- 29
- 30
- 31
- 32
- 33
- 34
- 35
- 36
- 37
- 38
- 39
- 40
- 41
- 42
- 43
- 44
- 45
- 46
- 47
- 48
- 49
- 50
- 51
- 52
- 53
- 54
- 55
- 56
- 57
- 58
- 59
- 60



**Supplementary document 3: The sensitivity analysis of effect of dexmedetomidine on PONV**

| Study                       | Odds Ratio  | 95% CI              |
|-----------------------------|-------------|---------------------|
| Omitting Asri 2020          | 0.51        | [0.37, 0.70]        |
| Omitting Bafna 2021         | 0.46        | [0.33, 0.63]        |
| Omitting Bakri 2015         | 0.47        | [0.34, 0.66]        |
| Omitting Bakshi 2020        | 0.47        | [0.34, 0.64]        |
| Omitting Bala 2019          | 0.50        | [0.36, 0.69]        |
| Omitting Bielka 2018        | 0.51        | [0.37, 0.70]        |
| Omitting Chen 2016          | 0.47        | [0.34, 0.65]        |
| Omitting Chen 2020          | 0.49        | [0.36, 0.68]        |
| Omitting Chen2021           | 0.49        | [0.35, 0.67]        |
| Omitting Chen 2021          | 0.51        | [0.37, 0.70]        |
| Omitting Das 2018           | 0.51        | [0.37, 0.70]        |
| Omitting Lu 2021            | 0.42        | [0.29, 0.60]        |
| Omitting Peng 2015          | 0.53        | [0.38, 0.73]        |
| Omitting Pi 2021            | 0.49        | [0.36, 0.68]        |
| Omitting Prashantha 2021    | 0.52        | [0.37, 0.72]        |
| Omitting Wu2019             | 0.52        | [0.38, 0.71]        |
| Omitting Wu 2019            | 0.49        | [0.36, 0.68]        |
| Omitting Yan 2021           | 0.46        | [0.34, 0.64]        |
| <b>Random effects model</b> | <b>0.48</b> | <b>[0.32, 0.73]</b> |
