# Supplementary material for: Effect of dexmedetomidine on postoperative nausea and vomiting in patients under general anaesthesia: an updated meta-analysis of randomised controlled trials
Source: PubMed Central journal article supplement — BMJ Open. 2023 Aug 1;13(8):e067102. doi: 10.1136/bmjopen-2022-067102 (PMC10394554; doi:10.1136/bmjopen-2022-067102), 2023-08-01
Supplement: bmjopen-2022-067102supp002.pdf [file bmjopen-2022-067102supp002.pdf]

## Supplementary document 2: The search strategy

### Pubmed (<https://pubmed.ncbi.nlm.nih.gov/>)

Search: (((((((Dexmedetomidine[MeSH Terms]) OR (Dexmedetomidine[Title/Abstract])) OR (MPV-1440[Title/Abstract])) OR (MPV 1440[Title/Abstract])) OR (MPV1440[Title/Abstract])) OR (Precedex[Title/Abstract])) OR (Dexmedetomidine Hydrochloride[Title/Abstract])) OR (Hydrochloride, Dexmedetomidine[Title/Abstract]) AND (("Postoperative Nausea and Vomiting"[Mesh]) OR (((((((PONV[Title/Abstract]) OR (Nausea[Title/Abstract]) AND Vomiting, Postoperative[Title/Abstract])) OR (Vomiting, Postoperative[Title/Abstract])) OR (Postoperative Emesis[Title/Abstract]) OR (Postoperative Vomiting[Title/Abstract])) OR (Emesis, Postoperative[Title/Abstract])) OR (Emeses, Postoperative[Title/Abstract])) OR (Postoperative Emeses[Title/Abstract])) OR (Postoperative Nausea[Title/Abstract])) OR (Nausea, Postoperative[Title/Abstract])) AND (2000:2022[pdat])

### Embase (<http://www.embase.com/>)

- #1 Dexmedetomidine
- #2 'mpv- 1440':ab,ti OR 'mpv 1440':ab,ti OR 'mpv1440':ab,ti OR 'precedex':ab,ti OR 'dexmedetomidine hydrochloride':ab,ti OR 'hydrochloride, dexmedetomidine':ab,ti
- #3 #1 OR #2
- #4 postoperative nausea and vomiting
- #5 'ponv':ab,ti OR 'nausea and vomiting, postoperative':ab,ti OR 'vomiting, postoperative':ab,ti OR 'postoperative emesis':ab,ti OR 'postoperative vomiting':ab,ti OR 'emesis, postoperative':ab,ti OR 'emeses, postoperative':ab,ti OR 'postoperative emeses':ab,ti OR 'postoperative nausea':ab,ti OR 'nausea, postoperative':ab,ti
- #6 #4 OR #5
- #7 [2000-2022]/py
- #8 #3 AND #6 AND #7

### Cochrane (<https://www.cochranelibrary.com/>)

- #1 Dexmedetomidine
- #2 (MPV- 1440):ti,ab,kw OR (MPV 1440):ti,ab,kw OR (MPV1440):ti,ab,kw OR (Precedex):ti,ab,kw OR (Dexmedetomidine Hydrochloride):ti,ab,kw OR (Hydrochloride, Dexmedetomidine):ti,ab,kw
- #3 #1 OR #2
- #4 **Postoperative nausea and vomiting**
- #5 (PONV):ti,ab,kw OR (Nausea and Vomiting, Postoperative):ti,ab,kw OR (Vomiting, Postoperative):ti,ab,kw OR (Postoperative Emesis):ti,ab,kw OR (Postoperative

Vomiting):ti,ab,kw OR (Emesis, Postoperative):ti,ab,kw OR (Emeses, Postoperative):ti,ab,kw  
OR (Postoperative Emeses):ti,ab,kw OR (Postoperative Nausea):ti,ab,kw OR (Nausea,  
Postoperative):ti,ab,kw

- #6 #4 OR #5
- #7 #3 AND #6 (with Publication Year from 2000 to 2022)

### **Web of Science (<http://apps.webofknowledge.com/>)**

- #1 TS= (Postoperative nausea and vomiting OR PONV OR Nausea and Vomiting, Postoperative OR Vomiting, Postoperative OR Postoperative Emesis OR Postoperative Vomiting OR Emesis, Postoperative OR Emeses, Postoperative OR Postoperative Emeses OR Postoperative Nausea OR Nausea, Postoperative)
- #2 TS= (Dexmedetomidine OR MPV-1440 OR MPV 1440 OR MPV1440 OR Precedex OR Dexmedetomidine Hydrochloride OR Hydrochloride, Dexmedetomidine)
- #3 PY= (2000-2022)
- #4 #1 and #2 and #3
