# Supplementary material for: Effect of dexmedetomidine on postoperative nausea and vomiting in patients under general anaesthesia: an updated meta-analysis of randomised controlled trials
Source: PubMed Central journal article supplement — BMJ Open. 2023 Aug 1;13(8):e067102. doi: 10.1136/bmjopen-2022-067102 (PMC10394554; doi:10.1136/bmjopen-2022-067102), 2023-08-01
Supplement: bmjopen-2022-067102supp003.pdf [file bmjopen-2022-067102supp003.pdf]

**Supplementary document 3:** The sensitivity analysis of effect of dexmedetomidine on PONV

| Study                       | Odds Ratio  | 95% CI              |
|-----------------------------|-------------|---------------------|
| Omitting Asri 2020          | 0.51        | [0.37, 0.70]        |
| Omitting Bafna 2021         | 0.46        | [0.33, 0.63]        |
| Omitting Bakri 2015         | 0.47        | [0.34, 0.66]        |
| Omitting Bakshi 2020        | 0.47        | [0.34, 0.64]        |
| Omitting Bala 2019          | 0.50        | [0.36, 0.69]        |
| Omitting Bielka 2018        | 0.51        | [0.37, 0.70]        |
| Omitting Chen 2016          | 0.47        | [0.34, 0.65]        |
| Omitting Chen 2020          | 0.49        | [0.36, 0.68]        |
| Omitting Chen2021           | 0.49        | [0.35, 0.67]        |
| Omitting Chen 2021          | 0.51        | [0.37, 0.70]        |
| Omitting Das 2018           | 0.51        | [0.37, 0.70]        |
| Omitting Lu 2021            | 0.42        | [0.29, 0.60]        |
| Omitting Peng 2015          | 0.53        | [0.38, 0.73]        |
| Omitting Pi 2021            | 0.49        | [0.36, 0.68]        |
| Omitting Prashantha 2021    | 0.52        | [0.37, 0.72]        |
| Omitting Wu2019             | 0.52        | [0.38, 0.71]        |
| Omitting Wu 2019            | 0.49        | [0.36, 0.68]        |
| Omitting Yan 2021           | 0.46        | [0.34, 0.64]        |
| <b>Random effects model</b> | <b>0.48</b> | <b>[0.32, 0.73]</b> |
